# Supplementary material for: New insight into the role of MMP14 in metabolic balance
Source: PeerJ. 2016 Jul 13;4:e2142. doi: 10.7717/peerj.2142 (PMC4950575; doi:10.7717/peerj.2142)
Supplement: Supplemental Information 1 [file peerj-04-2142-s001.xlsx]

## Sheet: Sheet1
	protein IDs
monosaccharide metabolic process (16)	Q64437, Q64133, O88958, P21550, O70250, P47857, P05064, Q99L13, P47968
hexose metabolic process (14)	Q9ET01, Q8BH04, Q9Z1E4, Q9Z2V4, Q8VHI3, P47857, P05064, Q64435, P47968, Q99L13, Q91ZW2, Q9QZ08, O70250, Q00612, O88958, P21550
generation of precursor metabolites and energy (20)	Q9ET01, Q8BH04, Q9Z1E4, Q9Z2V4, Q8VHI3, P47857, P05064, P47968, Q99L13, Q91ZW2, O70250, Q00612, O88958, P21550
translation (19)	Q9ET01, Q61462, Q7TMF3, P03911, Q9CQ54, P00416, Q9Z1E4, Q9Z2V4, P56395, P47857, Q9WUM5, P05064, Q9CQQ7, Q8R1I1, O70250, O88958, Q9CR21, P21550, Q99LY9, Q9QUH0
oxidation reduction (40)	Q3THG9, P62270, P57776, P27659, Q8BU88, P97461, Q8BH61, P62754, Q6ZWN5, P97351, Q8R1B4, Q8R050, Q505F5, Q6ZWU9, P35979, Q9Z1Q9, P61255, P62717, P62908
	Q64437, Q61147, Q64133, P50171, Q921F4, Q9CQ54, P56395, Q923B6, Q2TPA8, O70503, P13516, Q3UNZ8, O08999, O08807, P23591, Q00612, Q9D6Y7, P28301, P24547, Q99LY9, Q3V1T4, Q8VDQ1, Q8K023, Q61462, Q6P3A8, Q7TMF3, P03911, Q8K370, P00416, Q8R0N6, P11714, Q99L13, Q99KP3, P49429, P48776, Q62465, Q8R1I1, P51660, Q9CR21, Q9QUH0
