# Supplementary material for: New insight into the role of MMP14 in metabolic balance
Source: PeerJ. 2016 Jul 13;4:e2142. doi: 10.7717/peerj.2142 (PMC4950575; doi:10.7717/peerj.2142)
Supplement: Supplemental Information 2 [file peerj-04-2142-s002.xls]

## Sheet: Sheet4
			SILAM
accession	accession	description	KO/WT	LN(KO/WT)	color codes	Ln(KO/WT)
P16546	sp|P16546|SPTA2_MOUSE	Spectrin alpha chain, brain Sptan1	#DIV/0!	#DIV/0!		(2.5<)
P35492	sp|P35492|HUTH_MOUSE	Histidine ammonia-lyase Hal	#DIV/0!	#DIV/0!		(1.5 to 2.5)
Q9D952	sp|Q9D952|EVPL_MOUSE	Envoplakin Evpl	#DIV/0!	#DIV/0!		(0.5 to 1.5)
Q8CC88	sp|Q8CC88|K0564_MOUSE	Uncharacterized protein KIAA0564 homolog Kiaa0564	#DIV/0!	#DIV/0!		(-0.5 to 0.5)
Q2VIS4	sp|Q2VIS4|FILA2_MOUSE	Filaggrin-2 Flg2	330	5.79909		(-1.5 to -0.5)
Q8CGP5	sp|Q8CGP5|H2A1F_MOUSE	Histone H2A type 1-F Hist1h2af	248	5.51343		(-2.5 to -1.5)
P02535	sp|P02535|K1C10_MOUSE	Keratin, type I cytoskeletal 10 Krt10	211	5.35186		(<-2.5)
P11088	sp|P11088|FILA_MOUSE	Filaggrin (Fragment) Flg	185	5.22036
P60710	sp|P60710|ACTB_MOUSE	Actin, cytoplasmic 1 Actb	62	4.12713
Q61781	sp|Q61781|K1C14_MOUSE	Keratin, type I cytoskeletal 14 Krt14	61	4.11087
Q9QWL7	sp|Q9QWL7|K1C17_MOUSE	Keratin, type I cytoskeletal 17 Krt17	51	3.93183
Q9R0H5	sp|Q9R0H5|K2C71_MOUSE	Keratin, type II cytoskeletal 71 Krt71	51	3.93183
Q922U2	sp|Q922U2|K2C5_MOUSE	Keratin, type II cytoskeletal 5 Krt5	46	3.82864
E9Q557	sp|E9Q557|DESP_MOUSE	Desmoplakin Dsp	42	3.73767
Q9Z320	sp|Q9Z320|K1C27_MOUSE	Keratin, type I cytoskeletal 27 Krt27	40	3.68888
P04104	sp|P04104|K2C1_MOUSE	Keratin, type II cytoskeletal 1 Krt1	36	3.58352
Q6IFZ6	sp|Q6IFZ6|K2C1B_MOUSE	Keratin, type II cytoskeletal 1b Krt77	27	3.29584
Q7TMM9	sp|Q7TMM9|TBB2A_MOUSE	Tubulin beta-2A chain Tubb2a	25	3.21888
Q09PK2	sp|Q09PK2|APRV1_MOUSE	Retroviral-like aspartic protease 1 Asprv1	18	2.89037
O54983	sp|O54983|CRYM_MOUSE	Thiomorpholine-carboxylate dehydrogenase Crym	17	2.83321
A6BLY7	sp|A6BLY7|K1C28_MOUSE	Keratin, type I cytoskeletal 28 Krt28	15	2.70805
P05064	sp|P05064|ALDOA_MOUSE	Fructose-bisphosphate aldolase A Aldoa	14	2.63906
P26039	sp|P26039|TLN1_MOUSE	Talin-1 Tln1	13	2.56495
P50446	sp|P50446|K2C6A_MOUSE	Keratin, type II cytoskeletal 6A Krt6a	13	2.56495
P97861	sp|P97861|KRT86_MOUSE	Keratin, type II cuticular Hb6 Krt86	13	2.56495
O70456	sp|O70456|1433S_MOUSE	14-3-3 protein sigma Sfn	12	2.48491
Q6NXH9	sp|Q6NXH9|K2C73_MOUSE	Keratin, type II cytoskeletal 73 Krt73	12	2.48491
Q8VED5	sp|Q8VED5|K2C79_MOUSE	Keratin, type II cytoskeletal 79 Krt79	10	2.30259
Q61495	sp|Q61495|DSG1A_MOUSE	Desmoglein-1-alpha Dsg1a	9	2.19722
Q60605	sp|Q60605|MYL6_MOUSE	Myosin light polypeptide 6 Myl6	8	2.07944
P55849	sp|P55849|DSC1_MOUSE	Desmocollin-1 Dsc1	8	2.07944
Q6IFZ9	sp|Q6IFZ9|K2C74_MOUSE	Keratin, type II cytoskeletal 74 Krt74	8	2.07944
Q63870	sp|Q63870|CO7A1_MOUSE	Collagen alpha-1(VII) chain Col7a1	7	1.94591
Q8BGZ7	sp|Q8BGZ7|K2C75_MOUSE	Keratin, type II cytoskeletal 75 Krt75	7	1.94591
Q8CF02	sp|Q8CF02|FM25C_MOUSE	Protein FAM25C Fam25c	7	1.94591
P17879	sp|P17879|HS71B_MOUSE	Heat shock 70 kDa protein 1B Hspa1b	6	1.79176
P48997	sp|P48997|INVO_MOUSE	Involucrin Ivl	6	1.79176
Q02257	sp|Q02257|PLAK_MOUSE	Junction plakoglobin Jup	6	1.79176
Q3TTY5	sp|Q3TTY5|K22E_MOUSE	Keratin, type II cytoskeletal 2 epidermal Krt2	6	1.79176
Q6IMF0	sp|Q6IMF0|KRT83_MOUSE	Keratin, type II cuticular Hb3 Krt83	6	1.79176
Q7TPC1	sp|Q7TPC1|CDSN_MOUSE	Corneodesmosin Cdsn	6	1.79176
Q80X19	sp|Q80X19|COEA1_MOUSE	Collagen alpha-1(XIV) chain Col14a1	6	1.79176
Q8BK67	sp|Q8BK67|RCC2_MOUSE	Protein RCC2 Rcc2	6	1.79176
Q8K4L4	sp|Q8K4L4|POF1B_MOUSE	Protein POF1B Pof1b	6	1.79176
Q8R0W0	sp|Q8R0W0|EPIPL_MOUSE	Epiplakin Eppk1	6	1.79176
Q9WVC3	sp|Q9WVC3|CAV2_MOUSE	Caveolin-2 Cav2	6	1.79176
P97449	sp|P97449|AMPN_MOUSE	Aminopeptidase N Anpep	5.69231	1.73912
Q91X72	sp|Q91X72|HEMO_MOUSE	Hemopexin Hpx	5	1.60944
Q61879	sp|Q61879|MYH10_MOUSE	Myosin-10 Myh10	5	1.60944
O35143	sp|O35143|ATIF1_MOUSE	ATPase inhibitor, mitochondrial Atpif1	5	1.60944
P35173	sp|P35173|CYT3_MOUSE	Stefin-3 Stfa3	5	1.60944
Q61765	sp|Q61765|K1H1_MOUSE	Keratin, type I cuticular Ha1 Krt31	5	1.60944
Q6IME9	sp|Q6IME9|K2C72_MOUSE	Keratin, type II cytoskeletal 72 Krt72	5	1.60944
Q8BKG3	sp|Q8BKG3|PTK7_MOUSE	Inactive tyrosine-protein kinase 7 Ptk7	5	1.60944
Q3U1Z5	sp|Q3U1Z5|GPSM3_MOUSE	G-protein-signaling modulator 3 Gpsm3	4.86667	1.58241
A2AI08	sp|A2AI08|TPRN_MOUSE	Taperin Tprn	4.73913	1.55585
Q91WU5	sp|Q91WU5|AS3MT_MOUSE	Arsenite methyltransferase As3mt	4.66667	1.54045
P62192	sp|P62192|PRS4_MOUSE	26S protease regulatory subunit 4 Psmc1	4.19231	1.43325
Q3THG9	sp|Q3THG9|AASD1_MOUSE	Alanyl-tRNA editing protein Aarsd1 Aarsd1	4	1.38629
Q9JKB1	sp|Q9JKB1|UCHL3_MOUSE	Ubiquitin carboxyl-terminal hydrolase isozyme L3 Uchl3	4	1.38629
P25976	sp|P25976|UBF1_MOUSE	Nucleolar transcription factor 1 Ubtf	4	1.38629
Q61205	sp|Q61205|PA1B3_MOUSE	Platelet-activating factor acetylhydrolase IB subunit gamma Pafah1b3	4	1.38629
Q6ZWU9	sp|Q6ZWU9|RS27_MOUSE	40S ribosomal protein S27 Rps27	4	1.38629
Q80XI7	sp|Q80XI7|VOME_MOUSE	Vomeromodulin, Bpifb9a	4	1.38629
Q8K0Y2	sp|Q8K0Y2|KT33A_MOUSE	Keratin, type I cuticular Ha3-I Krt33a	4	1.38629
Q9JM83	sp|Q9JM83|CALM4_MOUSE	Calmodulin-4 Calm4	4	1.38629
P67778	sp|P67778|PHB_MOUSE	Prohibitin Phb	3.5283	1.26082
Q9Z0L8	sp|Q9Z0L8|GGH_MOUSE	Gamma-glutamyl hydrolase Ggh	3.37963	1.21777
Q8K4Z5	sp|Q8K4Z5|SF3A1_MOUSE	Splicing factor 3A subunit 1 Sf3a1	3.13208	1.1417
Q58A65	sp|Q58A65|JIP4_MOUSE	C-Jun-amino-terminal kinase-interacting protein 4 Spag9	3.02857	1.10809
Q99JI1	sp|Q99JI1|MSTN1_MOUSE	Musculoskeletal embryonic nuclear protein 1 Mustn1	3	1.09861
Q9EST1	sp|Q9EST1|GSDMA_MOUSE	Gasdermin-A Gsdma	3	1.09861
P22315	sp|P22315|HEMH_MOUSE	Ferrochelatase, mitochondrial Fech	2.8764	1.05654
P63325	sp|P63325|RS10_MOUSE	40S ribosomal protein S10 Rps10	2.5	0.916291
Q4U4S6	sp|Q4U4S6|XIRP2_MOUSE	Xin actin-binding repeat-containing protein 2 Xirp2	2.28814	0.827737
P00416	sp|P00416|COX3_MOUSE	Cytochrome c oxidase subunit 3 Mtco3	2.27778	0.8232
P70255	sp|P70255|NFIC_MOUSE	Nuclear factor 1 C-type Nfic	2.17333	0.776262
Q07113	sp|Q07113|MPRI_MOUSE	Cation-independent mannose-6-phosphate receptor Igf2r	2.14286	0.76214
Q9ET01	sp|Q9ET01|PYGL_MOUSE	Glycogen phosphorylase, liver form Pygl	2.09184	0.738043
P02469	sp|P02469|LAMB1_MOUSE	Laminin subunit beta-1 Lamb1	2.08911	0.736738
P80315	sp|P80315|TCPD_MOUSE	T-complex protein 1 subunit delta Cct4	2.0641	0.724696
Q9JM14	sp|Q9JM14|NT5C_MOUSE	5&#039;(3&#039;)-deoxyribonucleotidase, cytosolic type Nt5c	2.01389	0.700068
O88207	sp|O88207|CO5A1_MOUSE	Collagen alpha-1(V) chain Col5a1	2	0.693147
P63280	sp|P63280|UBC9_MOUSE	SUMO-conjugating enzyme UBC9 Ube2i	2	0.693147
Q8JZR0	sp|Q8JZR0|ACSL5_MOUSE	Long-chain-fatty-acid--CoA ligase 5 Acsl5	2	0.693147
Q60598	sp|Q60598|SRC8_MOUSE	Src substrate cortactin Cttn	2	0.693147
Q9D379	sp|Q9D379|HYEP_MOUSE	Epoxide hydrolase 1 Ephx1	2	0.693147
O35405	sp|O35405|PLD3_MOUSE	Phospholipase D3 Pld3	2	0.693147
P07744	sp|P07744|K2C4_MOUSE	Keratin, type II cytoskeletal 4 Krt4	2	0.693147
P12367	sp|P12367|KAP2_MOUSE	cAMP-dependent protein kinase type II-alpha regulatory subunit Prkar2a	2	0.693147
Q9D9F8	sp|Q9D9F8|MIPO1_MOUSE	Mirror-image polydactyly gene 1 protein homolog Mipol1	2	0.693147
A2A5X5	sp|A2A5X5|KR10D_MOUSE	Putative keratin-associated protein 10-like ENSP00000375147 homolog Gm11570	2	0.693147
O70551	sp|O70551|SRPK1_MOUSE	SRSF protein kinase 1 Srpk1	2	0.693147
P06797	sp|P06797|CATL1_MOUSE	Cathepsin L1 Ctsl1	2	0.693147
P26350	sp|P26350|PTMA_MOUSE	Prothymosin alpha Ptma	2	0.693147
P40240	sp|P40240|CD9_MOUSE	CD9 antigen Cd9	2	0.693147
P47757	sp|P47757|CAPZB_MOUSE	F-actin-capping protein subunit beta Capzb	2	0.693147
P48776	sp|P48776|T23O_MOUSE	Tryptophan 2,3-dioxygenase Tdo2	2	0.693147
P49717	sp|P49717|MCM4_MOUSE	DNA replication licensing factor MCM4 Mcm4	2	0.693147
P52927	sp|P52927|HMGA2_MOUSE	High mobility group protein HMGI-C Hmga2	2	0.693147
P55850	sp|P55850|DSC3_MOUSE	Desmocollin-3 Dsc3	2	0.693147
P57016	sp|P57016|LAD1_MOUSE	Ladinin-1 Lad1	2	0.693147
P62307	sp|P62307|RUXF_MOUSE	Small nuclear ribonucleoprotein F Snrpf	2	0.693147
P97310	sp|P97310|MCM2_MOUSE	DNA replication licensing factor MCM2 Mcm2	2	0.693147
Q148V8	sp|Q148V8|FA83H_MOUSE	Protein FAM83H Fam83h	2	0.693147
Q3UE31	sp|Q3UE31|K0930_MOUSE	Uncharacterized protein KIAA0930 homolog	2	0.693147
Q5SF07	sp|Q5SF07|IF2B2_MOUSE	Insulin-like growth factor 2 mRNA-binding protein 2 Igf2bp2	2	0.693147
Q5SS91	sp|Q5SS91|SUN3_MOUSE	SUN domain-containing protein 3 Sun3	2	0.693147
Q62432	sp|Q62432|SMAD2_MOUSE	Mothers against decapentaplegic homolog 2 Smad2	2	0.693147
Q64437	sp|Q64437|ADH7_MOUSE	Alcohol dehydrogenase class 4 mu/sigma chain Adh7	2	0.693147
Q717B4	sp|Q717B4|TDPZ3_MOUSE	TD and POZ domain-containing protein 3 Tdpoz3	2	0.693147
Q80X50	sp|Q80X50|UBP2L_MOUSE	Ubiquitin-associated protein 2-like Ubap2l	2	0.693147
Q80X72	sp|Q80X72|LRC15_MOUSE	Leucine-rich repeat-containing protein 15 Lrrc15	2	0.693147
Q8K019	sp|Q8K019|BCLF1_MOUSE	Bcl-2-associated transcription factor 1 Bclaf1	2	0.693147
Q8R1B4	sp|Q8R1B4|EIF3C_MOUSE	Eukaryotic translation initiation factor 3 subunit C Eif3c	2	0.693147
Q8VHR5	sp|Q8VHR5|P66B_MOUSE	Transcriptional repressor p66-beta Gatad2b	2	0.693147
Q921F4	sp|Q921F4|HNRLL_MOUSE	Heterogeneous nuclear ribonucleoprotein L-like Hnrpll	2	0.693147
Q923D4	sp|Q923D4|SF3B5_MOUSE	Splicing factor 3B subunit 5 Sf3b5	2	0.693147
Q99KP3	sp|Q99KP3|CRYL1_MOUSE	Lambda-crystallin homolog Cryl1	2	0.693147
Q99MR6	sp|Q99MR6|SRRT_MOUSE	Serrate RNA effector molecule homolog Srrt	2	0.693147
Q99PS0	sp|Q99PS0|K1C23_MOUSE	Keratin, type I cytoskeletal 23 Krt23	2	0.693147
Q9D883	sp|Q9D883|U2AF1_MOUSE	Splicing factor U2AF 35 kDa subunit U2af1	2	0.693147
Q9DBD5	sp|Q9DBD5|PELP1_MOUSE	Proline-, glutamic acid- and leucine-rich protein 1 Pelp1	2	0.693147
Q9DCT5	sp|Q9DCT5|SDF2_MOUSE	Stromal cell-derived factor 2 Sdf2	2	0.693147
Q9EQG3	sp|Q9EQG3|SCEL_MOUSE	Sciellin Scel	2	0.693147
Q9JJN2	sp|Q9JJN2|ZFHX4_MOUSE	Zinc finger homeobox protein 4 Zfhx4	2	0.693147
Q9R0S2	sp|Q9R0S2|MMP24_MOUSE	Matrix metalloproteinase-24 Mmp24	2	0.693147
Q9WVK4	sp|Q9WVK4|EHD1_MOUSE	EH domain-containing protein 1 Ehd1	2	0.693147
Q9Z1M8	sp|Q9Z1M8|RED_MOUSE	Protein Red Ik	2	0.693147
Q9Z1Q9	sp|Q9Z1Q9|SYVC_MOUSE	Valine--tRNA ligase Vars	2	0.693147
Q9Z2T6	sp|Q9Z2T6|KRT85_MOUSE	Keratin, type II cuticular Hb5 Krt85	2	0.693147
Q7TNP2	sp|Q7TNP2|2AAB_MOUSE	Serine/threonine-protein phosphatase 2A 65 kDa regulatory subunit A beta isoform Ppp2r1b	1.94737	0.666479
Q9R257	sp|Q9R257|HEBP1_MOUSE	Heme-binding protein 1 Hebp1	1.91892	0.651762
Q5FWK3	sp|Q5FWK3|RHG01_MOUSE	Rho GTPase-activating protein 1 Arhgap1	1.82609	0.602175
P03958	sp|P03958|ADA_MOUSE	Adenosine deaminase Ada	1.82407	0.601073
P48453	sp|P48453|PP2BB_MOUSE	Serine/threonine-protein phosphatase 2B catalytic subunit beta isoform Ppp3cb	1.8	0.587787
P14733	sp|P14733|LMNB1_MOUSE	Lamin-B1 Lmnb1	1.79688	0.586049
Q9WV55	sp|Q9WV55|VAPA_MOUSE	Vesicle-associated membrane protein-associated protein A Vapa	1.77381	0.57313
Q6P1D7	sp|Q6P1D7|SLX4_MOUSE	Structure-specific endonuclease subunit SLX4 Slx4	1.73	0.548121
P61255	sp|P61255|RL26_MOUSE	60S ribosomal protein L26 Rpl26	1.72727	0.546544
Q62465	sp|Q62465|VAT1_MOUSE	Synaptic vesicle membrane protein VAT-1 homolog Vat1	1.68254	0.520304
Q9CQV8	sp|Q9CQV8|1433B_MOUSE	14-3-3 protein beta/alpha Ywhab	1.6789	0.518138
Q5FW57	sp|Q5FW57|GLYAL_MOUSE	Glycine N-acyltransferase-like protein Gm4952	1.63636	0.492476
Q63810	sp|Q63810|CANB1_MOUSE	Calcineurin subunit B type 1 Ppp3r1	1.62687	0.486655
P21279	sp|P21279|GNAQ_MOUSE	Guanine nucleotide-binding protein G(q) subunit alpha Gnaq	1.61321	0.478224
Q80U70	sp|Q80U70|SUZ12_MOUSE	Polycomb protein Suz12 Suz12	1.60377	0.472359
Q5XJY5	sp|Q5XJY5|COPD_MOUSE	Coatomer subunit delta Arcn1	1.59722	0.468266
O55042	sp|O55042|SYUA_MOUSE	Alpha-synuclein Snca	1.57426	0.453784
Q9R111	sp|Q9R111|GUAD_MOUSE	Guanine deaminase Gda	1.55072	0.438722
Q8BHJ5	sp|Q8BHJ5|TBL1R_MOUSE	F-box-like/WD repeat-containing protein TBL1XR1 Tbl1xr1	1.544	0.434376
Q9Z0X1	sp|Q9Z0X1|AIFM1_MOUSE	Apoptosis-inducing factor 1, mitochondrial Aifm1	1.53846	0.430783
P61358	sp|P61358|RL27_MOUSE	60S ribosomal protein L27 Rpl27	1.528	0.42396
Q00519	sp|Q00519|XDH_MOUSE	Xanthine dehydrogenase/oxidase Xdh	1.52174	0.419854
P62702	sp|P62702|RS4X_MOUSE	40S ribosomal protein S4, X isoform Rps4x	1.52113	0.419451
P54728	sp|P54728|RD23B_MOUSE	UV excision repair protein RAD23 homolog B Rad23b	1.5082	0.410915
Q61704	sp|Q61704|ITIH3_MOUSE	Inter-alpha-trypsin inhibitor heavy chain H3 Itih3	1.5	0.405465
Q6PGH2	sp|Q6PGH2|HN1L_MOUSE	Hematological and neurological expressed 1-like protein Hn1l	1.5	0.405465
Q8BTZ7	sp|Q8BTZ7|GMPPB_MOUSE	Mannose-1-phosphate guanyltransferase beta Gmppb	1.5	0.405465
P63024	sp|P63024|VAMP3_MOUSE	Vesicle-associated membrane protein 3 Vamp3	1.5	0.405465
P63044	sp|P63044|VAMP2_MOUSE	Vesicle-associated membrane protein 2 Vamp2	1.5	0.405465
Q7TMK9	sp|Q7TMK9|HNRPQ_MOUSE	Heterogeneous nuclear ribonucleoprotein Q Syncrip	1.47561	0.389071
P07309	sp|P07309|TTHY_MOUSE	Transthyretin Ttr	1.47525	0.388826
P61089	sp|P61089|UBE2N_MOUSE	Ubiquitin-conjugating enzyme E2 N Ube2n	1.46296	0.380464
Q9Z1Y4	sp|Q9Z1Y4|TRIP6_MOUSE	Thyroid receptor-interacting protein 6 Trip6	1.46269	0.380275
P08551	sp|P08551|NFL_MOUSE	Neurofilament light polypeptide Nefl	1.4625	0.380147
P24452	sp|P24452|CAPG_MOUSE	Macrophage-capping protein Capg	1.46154	0.37949
P09793	sp|P09793|CTLA4_MOUSE	Cytotoxic T-lymphocyte protein 4 Ctla4	1.45833	0.377294
P60879	sp|P60879|SNP25_MOUSE	Synaptosomal-associated protein 25 Snap25	1.45783	0.37695
Q91VC7	sp|Q91VC7|PP14A_MOUSE	Protein phosphatase 1 regulatory subunit 14A Ppp1r14a	1.43269	0.359555
Q9QUM9	sp|Q9QUM9|PSA6_MOUSE	Proteasome subunit alpha type-6 Psma6	1.42857	0.356675
Q9DCJ5	sp|Q9DCJ5|NDUA8_MOUSE	NADH dehydrogenase [ubiquinone] 1 alpha subcomplex subunit 8 Ndufa8	1.42593	0.354821
Q6RHR9	sp|Q6RHR9|MAGI1_MOUSE	Membrane-associated guanylate kinase, WW and PDZ domain-containing protein 1 Magi1	1.42574	0.354693
Q9WUM4	sp|Q9WUM4|COR1C_MOUSE	Coronin-1C Coro1c	1.41772	0.349051
Q02248	sp|Q02248|CTNB1_MOUSE	Catenin beta-1 Ctnnb1	1.41429	0.346625
Q8BH00	sp|Q8BH00|AL8A1_MOUSE	Aldehyde dehydrogenase family 8 member A1 Aldh8a1	1.41096	0.34427
P00920	sp|P00920|CAH2_MOUSE	Carbonic anhydrase 2 Ca2	1.41	0.34359
Q91X91	sp|Q91X91|NADC_MOUSE	Nicotinate-nucleotide pyrophosphorylase [carboxylating] Qprt	1.4086	0.342598
Q922J3	sp|Q922J3|CLIP1_MOUSE	CAP-Gly domain-containing linker protein 1 Clip1	1.40659	0.341171
Q9DCT2	sp|Q9DCT2|NDUS3_MOUSE	NADH dehydrogenase [ubiquinone] iron-sulfur protein 3, mitochondrial Ndufs3	1.40196	0.337872
Q61553	sp|Q61553|FSCN1_MOUSE	Fascin Fscn1	1.40196	0.337872
Q6NZJ6	sp|Q6NZJ6|IF4G1_MOUSE	Eukaryotic translation initiation factor 4 gamma 1 Eif4g1	1.3871	0.327213
Q9QYX7	sp|Q9QYX7|PCLO_MOUSE	Protein piccolo Pclo	1.37634	0.319431
Q99MQ4	sp|Q99MQ4|ASPN_MOUSE	Asporin Aspn	1.37179	0.31612
P54227	sp|P54227|STMN1_MOUSE	Stathmin Stmn1	1.36709	0.312683
Q9CQ71	sp|Q9CQ71|RFA3_MOUSE	Replication protein A 14 kDa subunit Rpa3	1.36431	0.31065
P63242	sp|P63242|IF5A1_MOUSE	Eukaryotic translation initiation factor 5A-1 Eif5a	1.35965	0.307227
Q9WTX6	sp|Q9WTX6|CUL1_MOUSE	Cullin-1 Cul1	1.35811	0.306093
Q9QZD9	sp|Q9QZD9|EIF3I_MOUSE	Eukaryotic translation initiation factor 3 subunit I Eif3i	1.35802	0.306031
Q91WD5	sp|Q91WD5|NDUS2_MOUSE	NADH dehydrogenase [ubiquinone] iron-sulfur protein 2, mitochondrial Ndufs2	1.35366	0.302811
P35700	sp|P35700|PRDX1_MOUSE	Peroxiredoxin-1 Prdx1	1.35366	0.302811
P06801	sp|P06801|MAOX_MOUSE	NADP-dependent malic enzyme Me1	1.34211	0.294239
Q8BYI9	sp|Q8BYI9|TENR_MOUSE	Tenascin-R Tnr	1.33333	0.287682
P61222	sp|P61222|ABCE1_MOUSE	ATP-binding cassette sub-family E member 1 Abce1	1.33019	0.285321
P14148	sp|P14148|RL7_MOUSE	60S ribosomal protein L7 Rpl7	1.32692	0.282863
P38647	sp|P38647|GRP75_MOUSE	Stress-70 protein, mitochondrial Hspa9	1.32584	0.282048
Q61166	sp|Q61166|MARE1_MOUSE	Microtubule-associated protein RP/EB family member 1 Mapre1	1.32353	0.280302
Q9DCS2	sp|Q9DCS2|CP013_MOUSE	UPF0585 protein C16orf13 homolog	1.31915	0.276987
Q3UMF0	sp|Q3UMF0|COBL1_MOUSE	Cordon-bleu protein-like 1 Cobll1	1.31507	0.273889
Q62433	sp|Q62433|NDRG1_MOUSE	Protein NDRG1 Ndrg1	1.31429	0.273293
Q8VCW2	sp|Q8VCW2|K1C25_MOUSE	Keratin, type I cytoskeletal 25 Krt25	1.30864	0.26899
Q9DBH5	sp|Q9DBH5|LMAN2_MOUSE	Vesicular integral-membrane protein VIP36 Lman2	1.30769	0.268264
Q922D8	sp|Q922D8|C1TC_MOUSE	C-1-tetrahydrofolate synthase, cytoplasmic Mthfd1	1.3	0.262364
Q9D3D9	sp|Q9D3D9|ATPD_MOUSE	ATP synthase subunit delta, mitochondrial Atp5d	1.29412	0.257829
P61164	sp|P61164|ACTZ_MOUSE	Alpha-centractin Actr1a	1.28704	0.252343
P86048	sp|P86048|RL10L_MOUSE	60S ribosomal protein L10-like Rpl10l	1.28571	0.251314
Q6ZWV3	sp|Q6ZWV3|RL10_MOUSE	60S ribosomal protein L10 Rpl10	1.28571	0.251314
Q99LX0	sp|Q99LX0|PARK7_MOUSE	Protein DJ-1 Park7	1.27586	0.243622
Q8BFR5	sp|Q8BFR5|EFTU_MOUSE	Elongation factor Tu, mitochondrial Tufm	1.27451	0.242562
P20917	sp|P20917|MAG_MOUSE	Myelin-associated glycoprotein Mag	1.2735	0.241772
Q99J08	sp|Q99J08|S14L2_MOUSE	SEC14-like protein 2 Sec14l2	1.26923	0.238411
P16110	sp|P16110|LEG3_MOUSE	Galectin-3 Lgals3	1.2561	0.22801
P84096	sp|P84096|RHOG_MOUSE	Rho-related GTP-binding protein RhoG Rhog	1.25532	0.22739
Q93092	sp|Q93092|TALDO_MOUSE	Transaldolase Taldo1	1.24719	0.220894
Q9D8S9	sp|Q9D8S9|BOLA1_MOUSE	BolA-like protein 1 Bola1	1.24675	0.220543
Q61554	sp|Q61554|FBN1_MOUSE	Fibrillin-1 Fbn1	1.2451	0.219214
Q9CPV4	sp|Q9CPV4|GLOD4_MOUSE	Glyoxalase domain-containing protein 4 Glod4	1.24138	0.216223
P68254	sp|P68254|1433T_MOUSE	14-3-3 protein theta Ywhaq	1.23932	0.21456
Q99LD8	sp|Q99LD8|DDAH2_MOUSE	N(G),N(G)-dimethylarginine dimethylaminohydrolase 2 Ddah2	1.23596	0.211844
Q9DAK9	sp|Q9DAK9|PHP14_MOUSE	14 kDa phosphohistidine phosphatase Phpt1	1.22549	0.203341
Q8C1A5	sp|Q8C1A5|THOP1_MOUSE	Thimet oligopeptidase Thop1	1.2243	0.202368
Q8C9S4	sp|Q8C9S4|CJ118_MOUSE	Uncharacterized protein C10orf118 homolog Otg1	1.22222	0.200671
Q9DC70	sp|Q9DC70|NDUS7_MOUSE	NADH dehydrogenase [ubiquinone] iron-sulfur protein 7, mitochondrial Ndufs7	1.22078	0.199489
Q9QZM0	sp|Q9QZM0|UBQL2_MOUSE	Ubiquilin-2 Ubqln2	1.21839	0.197531
Q9DB77	sp|Q9DB77|QCR2_MOUSE	Cytochrome b-c1 complex subunit 2, mitochondrial Uqcrc2	1.21698	0.196373
P62082	sp|P62082|RS7_MOUSE	40S ribosomal protein S7 Rps7	1.21154	0.191891
P31230	sp|P31230|AIMP1_MOUSE	Aminoacyl tRNA synthase complex-interacting multifunctional protein 1 Aimp1	1.21053	0.191055
Q9QUI0	sp|Q9QUI0|RHOA_MOUSE	Transforming protein RhoA Rhoa	1.21	0.19062
O89053	sp|O89053|COR1A_MOUSE	Coronin-1A Coro1a	1.20952	0.190227
Q9D2G2	sp|Q9D2G2|ODO2_MOUSE	Dihydrolipoyllysine-residue succinyltransferase component of 2-oxoglutarate dehydrogenase complex, mitochondrial Dlst	1.20755	0.188591
P56564	sp|P56564|EAA1_MOUSE	Excitatory amino acid transporter 1 Slc1a3	1.20652	0.187742
Q99LJ6	sp|Q99LJ6|GPX7_MOUSE	Glutathione peroxidase 7 Gpx7	1.20482	0.18633
P58389	sp|P58389|PTPA_MOUSE	Serine/threonine-protein phosphatase 2A activator Ppp2r4	1.20455	0.186102
Q8VC30	sp|Q8VC30|DHAK_MOUSE	Bifunctional ATP-dependent dihydroxyacetone kinase/FAD-AMP lyase (cyclizing) Dak	1.20192	0.183923
Q9WTP6	sp|Q9WTP6|KAD2_MOUSE	Adenylate kinase 2, mitochondrial Ak2	1.2	0.182322
O70435	sp|O70435|PSA3_MOUSE	Proteasome subunit alpha type-3 Psma3	1.19565	0.178692
Q60967	sp|Q60967|PAPS1_MOUSE	Bifunctional 3&#039;-phosphoadenosine 5&#039;-phosphosulfate synthase 1 Papss1	1.1954	0.178483
Q8CH18	sp|Q8CH18|CCAR1_MOUSE	Cell division cycle and apoptosis regulator protein 1 Ccar1	1.19444	0.177681
Q8R3G1	sp|Q8R3G1|PP1R8_MOUSE	Nuclear inhibitor of protein phosphatase 1 Ppp1r8	1.19231	0.175891
P53395	sp|P53395|ODB2_MOUSE	Lipoamide acyltransferase component of branched-chain alpha-keto acid dehydrogenase complex, mitochondrial Dbt	1.19149	0.175204
P62814	sp|P62814|VATB2_MOUSE	V-type proton ATPase subunit B, brain isoform Atp6v1b2	1.19091	0.174717
Q91VD9	sp|Q91VD9|NDUS1_MOUSE	NADH-ubiquinone oxidoreductase 75 kDa subunit, mitochondrial Ndufs1	1.18627	0.170818
P24270	sp|P24270|CATA_MOUSE	Catalase Cat	1.18085	0.166235
Q9QXE0	sp|Q9QXE0|HACL1_MOUSE	2-hydroxyacyl-CoA lyase 1 Hacl1	1.18	0.165514
Q8R1G6	sp|Q8R1G6|PDLI2_MOUSE	PDZ and LIM domain protein 2 Pdlim2	1.16667	0.154151
P10852	sp|P10852|4F2_MOUSE	4F2 cell-surface antigen heavy chain Slc3a2	1.16484	0.15258
Q3TXS7	sp|Q3TXS7|PSMD1_MOUSE	26S proteasome non-ATPase regulatory subunit 1 Psmd1	1.16471	0.152469
P97820	sp|P97820|M4K4_MOUSE	Mitogen-activated protein kinase kinase kinase kinase 4 Map4k4	1.16304	0.15104
Q8BWF0	sp|Q8BWF0|SSDH_MOUSE	Succinate-semialdehyde dehydrogenase, mitochondrial Aldh5a1	1.16	0.14842
P24549	sp|P24549|AL1A1_MOUSE	Retinal dehydrogenase 1 Aldh1a1	1.16	0.14842
P57784	sp|P57784|RU2A_MOUSE	U2 small nuclear ribonucleoprotein A&#039; Snrpa1	1.16	0.14842
Q8BKZ9	sp|Q8BKZ9|ODPX_MOUSE	Pyruvate dehydrogenase protein X component, mitochondrial Pdhx	1.15789	0.146603
Q9JHL1	sp|Q9JHL1|NHRF2_MOUSE	Na(+)/H(+) exchange regulatory cofactor NHE-RF2 Slc9a3r2	1.15556	0.144581
Q3U7R1	sp|Q3U7R1|ESYT1_MOUSE	Extended synaptotagmin-1 Esyt1	1.15238	0.14183
Q9QXD6	sp|Q9QXD6|F16P1_MOUSE	Fructose-1,6-bisphosphatase 1 Fbp1	1.15152	0.141079
Q08857	sp|Q08857|CD36_MOUSE	Platelet glycoprotein 4 Cd36	1.15	0.139762
Q9CQS8	sp|Q9CQS8|SC61B_MOUSE	Protein transport protein Sec61 subunit beta Sec61b	1.14815	0.13815
P07901	sp|P07901|HS90A_MOUSE	Heat shock protein HSP 90-alpha Hsp90aa1	1.14737	0.137471
Q60932	sp|Q60932|VDAC1_MOUSE	Voltage-dependent anion-selective channel protein 1 Vdac1	1.14737	0.137471
Q9R269	sp|Q9R269|PEPL_MOUSE	Periplakin Ppl	1.14706	0.137201
O09131	sp|O09131|GSTO1_MOUSE	Glutathione S-transferase omega-1 Gsto1	1.14286	0.133531
Q64442	sp|Q64442|DHSO_MOUSE	Sorbitol dehydrogenase Sord	1.14286	0.133531
Q8QZS1	sp|Q8QZS1|HIBCH_MOUSE	3-hydroxyisobutyryl-CoA hydrolase, mitochondrial Hibch	1.14141	0.132268
A2ASS6	sp|A2ASS6|TITIN_MOUSE	Titin Ttn	1.14019	0.131192
P12970	sp|P12970|RL7A_MOUSE	60S ribosomal protein L7a Rpl7a	1.14019	0.131192
Q64737	sp|Q64737|PUR2_MOUSE	Trifunctional purine biosynthetic protein adenosine-3 Gart	1.13889	0.130053
P60766	sp|P60766|CDC42_MOUSE	Cell division control protein 42 homolog Cdc42	1.13684	0.128254
P55264	sp|P55264|ADK_MOUSE	Adenosine kinase Adk	1.13592	0.127445
P13020	sp|P13020|GELS_MOUSE	Gelsolin Gsn	1.13542	0.127
Q8CIE6	sp|Q8CIE6|COPA_MOUSE	Coatomer subunit alpha Copa	1.13483	0.126484
Q99LF4	sp|Q99LF4|RTCB_MOUSE	tRNA-splicing ligase RtcB homolog D10Wsu52e	1.13333	0.125163
Q91VM5	sp|Q91VM5|RMXL1_MOUSE	RNA binding motif protein, X-linked-like-1 Rbmxl1	1.13265	0.124563
Q9WV02	sp|Q9WV02|RBMX_MOUSE	RNA-binding motif protein, X chromosome Rbmx	1.13265	0.124563
A2ATU0	sp|A2ATU0|DHTK1_MOUSE	Probable 2-oxoglutarate dehydrogenase E1 component DHKTD1, mitochondrial Dhtkd1	1.13208	0.124053
P08122	sp|P08122|CO4A2_MOUSE	Collagen alpha-2(IV) chain Col4a2	1.13131	0.123379
P29758	sp|P29758|OAT_MOUSE	Ornithine aminotransferase, mitochondrial Oat	1.13043	0.122602
Q3UEB3	sp|Q3UEB3|PUF60_MOUSE	Poly(U)-binding-splicing factor PUF60 Puf60	1.12941	0.121697
Q9CWK8	sp|Q9CWK8|SNX2_MOUSE	Sorting nexin-2 Snx2	1.12931	0.121607
P68040	sp|P68040|GBLP_MOUSE	Guanine nucleotide-binding protein subunit beta-2-like 1 Gnb2l1	1.12903	0.121361
P39061	sp|P39061|COIA1_MOUSE	Collagen alpha-1(XVIII) chain Col18a1	1.12871	0.121078
P97427	sp|P97427|DPYL1_MOUSE	Dihydropyrimidinase-related protein 1 Crmp1	1.12644	0.119059
Q8R366	sp|Q8R366|IGSF8_MOUSE	Immunoglobulin superfamily member 8 Igsf8	1.12613	0.118784
P56812	sp|P56812|PDCD5_MOUSE	Programmed cell death protein 5 Pdcd5	1.125	0.117783
Q01730	sp|Q01730|RSU1_MOUSE	Ras suppressor protein 1 Rsu1	1.12381	0.116724
Q8BIJ6	sp|Q8BIJ6|SYIM_MOUSE	Isoleucine--tRNA ligase, mitochondrial Iars2	1.12174	0.11488
Q8BR07	sp|Q8BR07|BICD1_MOUSE	Protein bicaudal D homolog 1 Bicd1	1.12174	0.11488
Q6PIC6	sp|Q6PIC6|AT1A3_MOUSE	Sodium/potassium-transporting ATPase subunit alpha-3 Atp1a3	1.12121	0.11441
Q3UHX2	sp|Q3UHX2|HAP28_MOUSE	28 kDa heat- and acid-stable phosphoprotein Pdap1	1.12121	0.11441
P63011	sp|P63011|RAB3A_MOUSE	Ras-related protein Rab-3A Rab3a	1.12037	0.113659
O55142	sp|O55142|RL35A_MOUSE	60S ribosomal protein L35a Rpl35a	1.12	0.113329
Q9QVP4	sp|Q9QVP4|MLRA_MOUSE	Myosin regulatory light chain 2, atrial isoform Myl7	1.11881	0.112267
P17426	sp|P17426|AP2A1_MOUSE	AP-2 complex subunit alpha-1 Ap2a1	1.11828	0.111791
Q99JY0	sp|Q99JY0|ECHB_MOUSE	Trifunctional enzyme subunit beta, mitochondrial Hadhb	1.11702	0.110666
Q9D0K2	sp|Q9D0K2|SCOT1_MOUSE	Succinyl-CoA:3-ketoacid-coenzyme A transferase 1, mitochondrial Oxct1	1.1165	0.110203
O35643	sp|O35643|AP1B1_MOUSE	AP-1 complex subunit beta-1 Ap1b1	1.11579	0.109562
P35802	sp|P35802|GPM6A_MOUSE	Neuronal membrane glycoprotein M6-a Gpm6a	1.11538	0.109199
Q99KB8	sp|Q99KB8|GLO2_MOUSE	Hydroxyacylglutathione hydrolase, mitochondrial Hagh	1.11458	0.108481
P53657	sp|P53657|KPYR_MOUSE	Pyruvate kinase isozymes R/L Pklr	1.11386	0.107833
Q62371	sp|Q62371|DDR2_MOUSE	Discoidin domain-containing receptor 2 Ddr2	1.11364	0.107631
Q9CR68	sp|Q9CR68|UCRI_MOUSE	Cytochrome b-c1 complex subunit Rieske, mitochondrial Uqcrfs1	1.11224	0.10638
Q8CHT0	sp|Q8CHT0|AL4A1_MOUSE	Delta-1-pyrroline-5-carboxylate dehydrogenase, mitochondrial Aldh4a1	1.11111	0.105361
Q9D6R2	sp|Q9D6R2|IDH3A_MOUSE	Isocitrate dehydrogenase [NAD] subunit alpha, mitochondrial Idh3a	1.11111	0.105361
Q9D0J8	sp|Q9D0J8|PTMS_MOUSE	Parathymosin Ptms	1.10891	0.103378
Q9DCT8	sp|Q9DCT8|CRIP2_MOUSE	Cysteine-rich protein 2 Crip2	1.10784	0.102415
P04247	sp|P04247|MYG_MOUSE	Myoglobin Mb	1.10667	0.101352
Q8JZN5	sp|Q8JZN5|ACAD9_MOUSE	Acyl-CoA dehydrogenase family member 9, mitochondrial Acad9	1.10526	0.100083
Q9D0E1	sp|Q9D0E1|HNRPM_MOUSE	Heterogeneous nuclear ribonucleoprotein M Hnrnpm	1.10417	0.0990909
P52196	sp|P52196|THTR_MOUSE	Thiosulfate sulfurtransferase Tst	1.10377	0.0987348
P16045	sp|P16045|LEG1_MOUSE	Galectin-1 Lgals1	1.10227	0.0973742
Q07417	sp|Q07417|ACADS_MOUSE	Short-chain specific acyl-CoA dehydrogenase, mitochondrial Acads	1.10204	0.0971637
Q9DB15	sp|Q9DB15|RM12_MOUSE	39S ribosomal protein L12, mitochondrial Mrpl12	1.10204	0.0971637
O35286	sp|O35286|DHX15_MOUSE	Putative pre-mRNA-splicing factor ATP-dependent RNA helicase DHX15 Dhx15	1.10204	0.0971637
P11352	sp|P11352|GPX1_MOUSE	Glutathione peroxidase 1 Gpx1	1.10185	0.0969923
Q8VHA6	sp|Q8VHA6|ASB18_MOUSE	Ankyrin repeat and SOCS box protein 18 Asb18	1.10185	0.0969923
P15105	sp|P15105|GLNA_MOUSE	Glutamine synthetase Glul	1.10101	0.096228
P11983	sp|P11983|TCPA_MOUSE	T-complex protein 1 subunit alpha Tcp1	1.10101	0.096228
Q99020	sp|Q99020|ROAA_MOUSE	Heterogeneous nuclear ribonucleoprotein A/B Hnrnpab	1.10092	0.0961439
P43275	sp|P43275|H11_MOUSE	Histone H1.1 Hist1h1a	1.1	0.0953102
Q8K012	sp|Q8K012|FBP1L_MOUSE	Formin-binding protein 1-like Fnbp1l	1.1	0.0953102
Q9DC50	sp|Q9DC50|OCTC_MOUSE	Peroxisomal carnitine O-octanoyltransferase Crot	1.1	0.0953102
P08226	sp|P08226|APOE_MOUSE	Apolipoprotein E Apoe	1.09901	0.0944097
P28656	sp|P28656|NP1L1_MOUSE	Nucleosome assembly protein 1-like 1 Nap1l1	1.09783	0.0933319
Q921T2	sp|Q921T2|TOIP1_MOUSE	Torsin-1A-interacting protein 1 Tor1aip1	1.09709	0.0926588
P40936	sp|P40936|INMT_MOUSE	Indolethylamine N-methyltransferase Inmt	1.09615	0.0918075
O35098	sp|O35098|DPYL4_MOUSE	Dihydropyrimidinase-related protein 4 Dpysl4	1.09615	0.0918075
P32921	sp|P32921|SYWC_MOUSE	Tryptophan--tRNA ligase, cytoplasmic Wars	1.09574	0.0914342
Q9JKC6	sp|Q9JKC6|CEND_MOUSE	Cell cycle exit and neuronal differentiation protein 1 Cend1	1.09524	0.0909718
P12660	sp|P12660|PCP2_MOUSE	Purkinje cell protein 2 Pcp2	1.09434	0.0901511
P30115	sp|P30115|GSTA3_MOUSE	Glutathione S-transferase A3 Gsta3	1.09346	0.0893451
P84228	sp|P84228|H32_MOUSE	Histone H3.2 Hist1h3b	1.09302	0.0889475
Q9CPU2	sp|Q9CPU2|NDUB2_MOUSE	NADH dehydrogenase [ubiquinone] 1 beta subcomplex subunit 2, mitochondrial Ndufb2	1.09278	0.0887281
Q99P72	sp|Q99P72|RTN4_MOUSE	Reticulon-4 Rtn4	1.09184	0.0878614
P08074	sp|P08074|CBR2_MOUSE	Carbonyl reductase [NADPH] 2 Cbr2	1.09	0.0861777
P56394	sp|P56394|COX17_MOUSE	Cytochrome c oxidase copper chaperone Cox17	1.09	0.0861777
P54923	sp|P54923|ADPRH_MOUSE	[Protein ADP-ribosylarginine] hydrolase Adprh	1.08824	0.0845574
Q9DCC4	sp|Q9DCC4|P5CR3_MOUSE	Pyrroline-5-carboxylate reductase 3 Pycrl	1.08824	0.0845574
Q9EQU5	sp|Q9EQU5|SET_MOUSE	Protein SET Set	1.08738	0.0837699
Q9R1P1	sp|Q9R1P1|PSB3_MOUSE	Proteasome subunit beta type-3 Psmb3	1.08696	0.0833816
Q9QYJ3	sp|Q9QYJ3|DNJB1_MOUSE	DnaJ homolog subfamily B member 1 Dnajb1	1.08696	0.0833816
Q91YH5	sp|Q91YH5|ATLA3_MOUSE	Atlastin-3 Atl3	1.08491	0.081493
Q8R5J9	sp|Q8R5J9|PRAF3_MOUSE	PRA1 family protein 3 Arl6ip5	1.08462	0.0812254
Q9WUA2	sp|Q9WUA2|SYFB_MOUSE	Phenylalanine--tRNA ligase beta subunit Farsb	1.08421	0.0808521
P09542	sp|P09542|MYL3_MOUSE	Myosin light chain 3 Myl3	1.08411	0.0807614
Q64433	sp|Q64433|CH10_MOUSE	10 kDa heat shock protein, mitochondrial Hspe1	1.08247	0.0792494
Q9EQ20	sp|Q9EQ20|MMSA_MOUSE	Methylmalonate-semialdehyde dehydrogenase [acylating], mitochondrial Aldh6a1	1.08247	0.0792494
Q61739	sp|Q61739|ITA6_MOUSE	Integrin alpha-6 Itga6	1.08108	0.0779615
Q99PL5	sp|Q99PL5|RRBP1_MOUSE	Ribosome-binding protein 1 Rrbp1	1.08081	0.077709
P26369	sp|P26369|U2AF2_MOUSE	Splicing factor U2AF 65 kDa subunit U2af2	1.08081	0.077709
P48678	sp|P48678|LMNA_MOUSE	Prelamin-A/C Lmna	1.08	0.076961
Q63880	sp|Q63880|EST3A_MOUSE	Carboxylesterase 3A Ces3a	1.08	0.076961
Q6PIE5	sp|Q6PIE5|AT1A2_MOUSE	Sodium/potassium-transporting ATPase subunit alpha-2 Atp1a2	1.07921	0.0762274
Q8VCT4	sp|Q8VCT4|CES1D_MOUSE	Carboxylesterase 1D Ces1d	1.07843	0.0755076
Q61937	sp|Q61937|NPM_MOUSE	Nucleophosmin Npm1	1.07843	0.0755076
Q8BGD9	sp|Q8BGD9|IF4B_MOUSE	Eukaryotic translation initiation factor 4B Eif4b	1.07778	0.0749013
Q9EQ06	sp|Q9EQ06|DHB11_MOUSE	Estradiol 17-beta-dehydrogenase 11 Hsd17b11	1.07692	0.074108
P26645	sp|P26645|MARCS_MOUSE	Myristoylated alanine-rich C-kinase substrate Marcks	1.07627	0.0735025
Q9CX86	sp|Q9CX86|ROA0_MOUSE	Heterogeneous nuclear ribonucleoprotein A0 Hnrnpa0	1.07547	0.0727594
P09055	sp|P09055|ITB1_MOUSE	Integrin beta-1 Itgb1	1.07339	0.0708261
P80318	sp|P80318|TCPG_MOUSE	T-complex protein 1 subunit gamma Cct3	1.07339	0.0708261
P53026	sp|P53026|RL10A_MOUSE	60S ribosomal protein L10a Rpl10a	1.07292	0.0703808
Q3UM45	sp|Q3UM45|PP1R7_MOUSE	Protein phosphatase 1 regulatory subunit 7 Ppp1r7	1.07216	0.0696799
P29341	sp|P29341|PABP1_MOUSE	Polyadenylate-binding protein 1 Pabpc1	1.07071	0.0683192
P61161	sp|P61161|ARP2_MOUSE	Actin-related protein 2 Actr2	1.06931	0.0670107
Q9DCS3	sp|Q9DCS3|MECR_MOUSE	Trans-2-enoyl-CoA reductase, mitochondrial Mecr	1.06863	0.0663751
Q99KF1	sp|Q99KF1|TMED9_MOUSE	Transmembrane emp24 domain-containing protein 9 Tmed9	1.06863	0.0663751
P10107	sp|P10107|ANXA1_MOUSE	Annexin A1 Anxa1	1.06796	0.0657514
P30275	sp|P30275|KCRU_MOUSE	Creatine kinase U-type, mitochondrial Ckmt1	1.06731	0.0651393
Q9WUK2	sp|Q9WUK2|IF4H_MOUSE	Eukaryotic translation initiation factor 4H Eif4h	1.06731	0.0651393
P13707	sp|P13707|GPDA_MOUSE	Glycerol-3-phosphate dehydrogenase [NAD(+)], cytoplasmic Gpd1	1.06667	0.0645385
P17742	sp|P17742|PPIA_MOUSE	Peptidyl-prolyl cis-trans isomerase A Ppia	1.06667	0.0645385
O88737	sp|O88737|BSN_MOUSE	Protein bassoon Bsn	1.06667	0.0645385
P28481	sp|P28481|CO2A1_MOUSE	Collagen alpha-1(II) chain Col2a1	1.06604	0.0639487
Q9JLF6	sp|Q9JLF6|TGM1_MOUSE	Protein-glutamine gamma-glutamyltransferase K Tgm1	1.06604	0.0639487
P18760	sp|P18760|COF1_MOUSE	Cofilin-1 Cfl1	1.06481	0.0628009
Q9CQC7	sp|Q9CQC7|NDUB4_MOUSE	NADH dehydrogenase [ubiquinone] 1 beta subcomplex subunit 4 Ndufb4	1.06364	0.0616936
Q9R0P5	sp|Q9R0P5|DEST_MOUSE	Destrin Dstn	1.06364	0.0616936
P14069	sp|P14069|S10A6_MOUSE	Protein S100-A6 S100a6	1.06316	0.0612436
Q91Z31	sp|Q91Z31|PTBP2_MOUSE	Polypyrimidine tract-binding protein 2 Ptbp2	1.0614	0.0595921
O88342	sp|O88342|WDR1_MOUSE	WD repeat-containing protein 1 Wdr1	1.06122	0.0594234
P23506	sp|P23506|PIMT_MOUSE	Protein-L-isoaspartate(D-aspartate) O-methyltransferase Pcmt1	1.06061	0.0588405
P47941	sp|P47941|CRKL_MOUSE	Crk-like protein Crkl	1.06	0.0582689
Q3THE2	sp|Q3THE2|ML12B_MOUSE	Myosin regulatory light chain 12B Myl12b	1.06	0.0582689
Q922Y1	sp|Q922Y1|UBXN1_MOUSE	UBX domain-containing protein 1 Ubxn1	1.06	0.0582689
Q9CQ62	sp|Q9CQ62|DECR_MOUSE	2,4-dienoyl-CoA reductase, mitochondrial Decr1	1.05941	0.0577083
Q8VDN2	sp|Q8VDN2|AT1A1_MOUSE	Sodium/potassium-transporting ATPase subunit alpha-1 Atp1a1	1.05941	0.0577083
P04186	sp|P04186|CFAB_MOUSE	Complement factor B Cfb	1.05941	0.0577083
Q91XV3	sp|Q91XV3|BASP1_MOUSE	Brain acid soluble protein 1 Basp1	1.05941	0.0577083
Q9Z2Q6	sp|Q9Z2Q6|SEPT5_MOUSE	Septin-5 Sept5	1.05941	0.0577083
Q99KN9	sp|Q99KN9|EPN4_MOUSE	Clathrin interactor 1 Clint1	1.05932	0.0576291
P15864	sp|P15864|H12_MOUSE	Histone H1.2 Hist1h1c	1.05882	0.0571584
P05202	sp|P05202|AATM_MOUSE	Aspartate aminotransferase, mitochondrial Got2	1.05882	0.0571584
Q9D051	sp|Q9D051|ODPB_MOUSE	Pyruvate dehydrogenase E1 component subunit beta, mitochondrial Pdhb	1.05882	0.0571584
P60843	sp|P60843|IF4A1_MOUSE	Eukaryotic initiation factor 4A-I Eif4a1	1.05882	0.0571584
Q91V92	sp|Q91V92|ACLY_MOUSE	ATP-citrate synthase Acly	1.05882	0.0571584
Q91X83	sp|Q91X83|METK1_MOUSE	S-adenosylmethionine synthase isoform type-1 Mat1a	1.05882	0.0571584
Q99KI0	sp|Q99KI0|ACON_MOUSE	Aconitate hydratase, mitochondrial Aco2	1.05825	0.0566189
Q8VCX1	sp|Q8VCX1|AK1D1_MOUSE	3-oxo-5-beta-steroid 4-dehydrogenase Akr1d1	1.05825	0.0566189
Q05A80	sp|Q05A80|CAPR2_MOUSE	Caprin-2 Caprin2	1.05825	0.0566189
Q64105	sp|Q64105|SPRE_MOUSE	Sepiapterin reductase Spr	1.05825	0.0566189
O08599	sp|O08599|STXB1_MOUSE	Syntaxin-binding protein 1 Stxbp1	1.05769	0.0560895
P12787	sp|P12787|COX5A_MOUSE	Cytochrome c oxidase subunit 5A, mitochondrial Cox5a	1.05714	0.0555699
O08677	sp|O08677|KNG1_MOUSE	Kininogen-1 Kng1	1.05714	0.0555699
Q62426	sp|Q62426|CYTB_MOUSE	Cystatin-B Cstb	1.05714	0.0555699
Q8BJH1	sp|Q8BJH1|ZC21A_MOUSE	Zinc finger C2HC domain-containing protein 1A Zc2hc1a	1.05714	0.0555699
Q62261	sp|Q62261|SPTB2_MOUSE	Spectrin beta chain, brain 1 Sptbn1	1.0566	0.0550598
P14873	sp|P14873|MAP1B_MOUSE	Microtubule-associated protein 1B Map1b	1.0566	0.0550598
P19246	sp|P19246|NFH_MOUSE	Neurofilament heavy polypeptide Nefh	1.0566	0.0550598
Q99L47	sp|Q99L47|F10A1_MOUSE	Hsc70-interacting protein St13	1.0566	0.0550598
P63254	sp|P63254|CRIP1_MOUSE	Cysteine-rich protein 1 Crip1	1.0566	0.0550598
Q9ES28	sp|Q9ES28|ARHG7_MOUSE	Rho guanine nucleotide exchange factor 7 Arhgef7	1.0566	0.0550598
P80316	sp|P80316|TCPE_MOUSE	T-complex protein 1 subunit epsilon Cct5	1.05607	0.054559
O70318	sp|O70318|E41L2_MOUSE	Band 4.1-like protein 2 Epb41l2	1.05607	0.054559
P45952	sp|P45952|ACADM_MOUSE	Medium-chain specific acyl-CoA dehydrogenase, mitochondrial Acadm	1.05556	0.0540672
Q99LC3	sp|Q99LC3|NDUAA_MOUSE	NADH dehydrogenase [ubiquinone] 1 alpha subcomplex subunit 10, mitochondrial Ndufa10	1.05319	0.0518251
Q9JJV2	sp|Q9JJV2|PROF2_MOUSE	Profilin-2 Pfn2	1.05319	0.0518251
Q6NZB0	sp|Q6NZB0|DNJC8_MOUSE	DnaJ homolog subfamily C member 8 Dnajc8	1.05208	0.0507723
P49312	sp|P49312|ROA1_MOUSE	Heterogeneous nuclear ribonucleoprotein A1 Hnrnpa1	1.05051	0.049271
O08997	sp|O08997|ATOX1_MOUSE	Copper transport protein ATOX1 Atox1	1.05051	0.049271
P62315	sp|P62315|SMD1_MOUSE	Small nuclear ribonucleoprotein Sm D1 Snrpd1	1.05051	0.049271
Q61316	sp|Q61316|HSP74_MOUSE	Heat shock 70 kDa protein 4 Hspa4	1.05051	0.049271
P01868	sp|P01868|IGHG1_MOUSE	Ig gamma-1 chain C region secreted form Ighg1	1.05	0.0487902
P01869	sp|P01869|IGH1M_MOUSE	Ig gamma-1 chain C region, membrane-bound form Ighg1	1.05	0.0487902
Q61335	sp|Q61335|BAP31_MOUSE	B-cell receptor-associated protein 31 Bcap31	1.05	0.0487902
Q61414	sp|Q61414|K1C15_MOUSE	Keratin, type I cytoskeletal 15 Krt15	1.05	0.0487902
P09405	sp|P09405|NUCL_MOUSE	Nucleolin Ncl	1.04902	0.047856
Q61176	sp|Q61176|ARGI1_MOUSE	Arginase-1 Arg1	1.04902	0.047856
Q8R1Q8	sp|Q8R1Q8|DC1L1_MOUSE	Cytoplasmic dynein 1 light intermediate chain 1 Dync1li1	1.04902	0.047856
P68510	sp|P68510|1433F_MOUSE	14-3-3 protein eta Ywhah	1.04902	0.047856
Q05816	sp|Q05816|FABP5_MOUSE	Fatty acid-binding protein, epidermal Fabp5	1.04902	0.047856
P14824	sp|P14824|ANXA6_MOUSE	Annexin A6 Anxa6	1.04854	0.0474022
Q91WQ3	sp|Q91WQ3|SYYC_MOUSE	Tyrosine--tRNA ligase, cytoplasmic Yars	1.04854	0.0474022
Q91ZJ5	sp|Q91ZJ5|UGPA_MOUSE	UTP--glucose-1-phosphate uridylyltransferase Ugp2	1.04854	0.0474022
O35350	sp|O35350|CAN1_MOUSE	Calpain-1 catalytic subunit Capn1	1.04854	0.0474022
P62259	sp|P62259|1433E_MOUSE	14-3-3 protein epsilon Ywhae	1.04808	0.046957
P27546	sp|P27546|MAP4_MOUSE	Microtubule-associated protein 4 Map4	1.04808	0.046957
Q9Z2U1	sp|Q9Z2U1|PSA5_MOUSE	Proteasome subunit alpha type-5 Psma5	1.04808	0.046957
P18242	sp|P18242|CATD_MOUSE	Cathepsin D Ctsd	1.04808	0.046957
P51855	sp|P51855|GSHB_MOUSE	Glutathione synthetase Gss	1.04808	0.046957
Q6ZPZ3	sp|Q6ZPZ3|ZC3H4_MOUSE	Zinc finger CCCH domain-containing protein 4 Zc3h4	1.04808	0.046957
P20152	sp|P20152|VIME_MOUSE	Vimentin Vim	1.04762	0.04652
P28653	sp|P28653|PGS1_MOUSE	Biglycan Bgn	1.04762	0.04652
P09813	sp|P09813|APOA2_MOUSE	Apolipoprotein A-II Apoa2	1.04717	0.0460911
P97371	sp|P97371|PSME1_MOUSE	Proteasome activator complex subunit 1 Psme1	1.04717	0.0460911
P62830	sp|P62830|RL23_MOUSE	60S ribosomal protein L23 Rpl23	1.04717	0.0460911
Q9D2V8	sp|Q9D2V8|MFS10_MOUSE	Major facilitator superfamily domain-containing protein 10 Mfsd10	1.04673	0.04567
Q9Z2W0	sp|Q9Z2W0|DNPEP_MOUSE	Aspartyl aminopeptidase Dnpep	1.0463	0.0452566
O70492	sp|O70492|SNX3_MOUSE	Sorting nexin-3 Snx3	1.04587	0.0448506
Q9JJU8	sp|Q9JJU8|SH3L1_MOUSE	SH3 domain-binding glutamic acid-rich-like protein Sh3bgrl	1.04545	0.0444518
Q9DC61	sp|Q9DC61|MPPA_MOUSE	Mitochondrial-processing peptidase subunit alpha Pmpca	1.04494	0.0439631
Q6IRU2	sp|Q6IRU2|TPM4_MOUSE	Tropomyosin alpha-4 chain Tpm4	1.04348	0.0425596
Q00915	sp|Q00915|RET1_MOUSE	Retinol-binding protein 1 Rbp1	1.04274	0.0418471
P63328	sp|P63328|PP2BA_MOUSE	Serine/threonine-protein phosphatase 2B catalytic subunit alpha isoform Ppp3ca	1.04	0.0392207
Q99K51	sp|Q99K51|PLST_MOUSE	Plastin-3 Pls3	1.04	0.0392207
Q9Z2I8	sp|Q9Z2I8|SUCB2_MOUSE	Succinyl-CoA ligase [GDP-forming] subunit beta, mitochondrial Suclg2	1.04	0.0392207
Q9QUR7	sp|Q9QUR7|PIN1_MOUSE	Peptidyl-prolyl cis-trans isomerase NIMA-interacting 1 Pin1	1.0396	0.0388398
A2AS89	sp|A2AS89|SPEB_MOUSE	Agmatinase, mitochondrial Agmat	1.0396	0.0388398
P68368	sp|P68368|TBA4A_MOUSE	Tubulin alpha-4A chain Tuba4a	1.03883	0.0380998
P33173	sp|P33173|KIF1A_MOUSE	Kinesin-like protein KIF1A Kif1a	1.03883	0.0380998
P05213	sp|P05213|TBA1B_MOUSE	Tubulin alpha-1B chain Tuba1b	1.03846	0.0377403
P68373	sp|P68373|TBA1C_MOUSE	Tubulin alpha-1C chain Tuba1c	1.03846	0.0377403
P28665	sp|P28665|MUG1_MOUSE	Murinoglobulin-1 Mug1	1.03846	0.0377403
Q62095	sp|Q62095|DDX3Y_MOUSE	ATP-dependent RNA helicase DDX3Y Ddx3y	1.03846	0.0377403
O70251	sp|O70251|EF1B_MOUSE	Elongation factor 1-beta Eef1b	1.03846	0.0377403
P40142	sp|P40142|TKT_MOUSE	Transketolase Tkt	1.0381	0.0373875
Q9WVA4	sp|Q9WVA4|TAGL2_MOUSE	Transgelin-2 Tagln2	1.0381	0.0373875
O88492	sp|O88492|PLIN4_MOUSE	Perilipin-4 Plin4	1.0381	0.0373875
Q02788	sp|Q02788|CO6A2_MOUSE	Collagen alpha-2(VI) chain Col6a2	1.0381	0.0373875
Q9JII6	sp|Q9JII6|AK1A1_MOUSE	Alcohol dehydrogenase [NADP(+)] Akr1a1	1.0381	0.0373875
Q9EST5	sp|Q9EST5|AN32B_MOUSE	Acidic leucine-rich nuclear phosphoprotein 32 family member B Anp32b	1.0381	0.0373875
Q9CQM9	sp|Q9CQM9|GLRX3_MOUSE	Glutaredoxin-3 Glrx3	1.0381	0.0373875
Q9DCQ2	sp|Q9DCQ2|ASPD_MOUSE	Putative L-aspartate dehydrogenase Aspdh	1.0381	0.0373875
P11679	sp|P11679|K2C8_MOUSE	Keratin, type II cytoskeletal 8 Krt8	1.03774	0.0370413
Q9CY58	sp|Q9CY58|PAIRB_MOUSE	Plasminogen activator inhibitor 1 RNA-binding protein Serbp1	1.03774	0.0370413
O70475	sp|O70475|UGDH_MOUSE	UDP-glucose 6-dehydrogenase Ugdh	1.03774	0.0370413
P97315	sp|P97315|CSRP1_MOUSE	Cysteine and glycine-rich protein 1 Csrp1	1.03774	0.0370413
Q9DBY8	sp|Q9DBY8|NVL_MOUSE	Nuclear valosin-containing protein-like Nvl	1.03774	0.0370413
Q505D7	sp|Q505D7|OPA3_MOUSE	Optic atrophy 3 protein homolog Opa3	1.03738	0.0367014
P63038	sp|P63038|CH60_MOUSE	60 kDa heat shock protein, mitochondrial Hspd1	1.03704	0.0363676
Q64152	sp|Q64152|BTF3_MOUSE	Transcription factor BTF3 Btf3	1.03704	0.0363676
Q62420	sp|Q62420|SH3G2_MOUSE	Endophilin-A1 Sh3gl2	1.0367	0.0360399
Q9Z2Y3	sp|Q9Z2Y3|HOME1_MOUSE	Homer protein homolog 1 Homer1	1.03371	0.0331522
P24527	sp|P24527|LKHA4_MOUSE	Leukotriene A-4 hydrolase Lta4h	1.03226	0.0317487
Q9DBL7	sp|Q9DBL7|COASY_MOUSE	Bifunctional coenzyme A synthase Coasy	1.03191	0.0314162
O35490	sp|O35490|BHMT1_MOUSE	Betaine--homocysteine S-methyltransferase 1 Bhmt	1.03158	0.0310906
Q76MZ3	sp|Q76MZ3|2AAA_MOUSE	Serine/threonine-protein phosphatase 2A 65 kDa regulatory subunit A alpha isoform Ppp2r1a	1.03158	0.0310906
Q8C6K9	sp|Q8C6K9|CO6A6_MOUSE	Collagen alpha-6(VI) chain Col6a6	1.03125	0.0307717
P48774	sp|P48774|GSTM5_MOUSE	Glutathione S-transferase Mu 5 Gstm5	1.03125	0.0307717
P10922	sp|P10922|H10_MOUSE	Histone H1.0 H1f0	1.03125	0.0307717
Q61206	sp|Q61206|PA1B2_MOUSE	Platelet-activating factor acetylhydrolase IB subunit beta Pafah1b2	1.03061	0.030153
P17156	sp|P17156|HSP72_MOUSE	Heat shock-related 70 kDa protein 2 Hspa2	1.03	0.0295588
P08003	sp|P08003|PDIA4_MOUSE	Protein disulfide-isomerase A4 Pdia4	1.0297	0.0292704
P48758	sp|P48758|CBR1_MOUSE	Carbonyl reductase [NADPH] 1 Cbr1	1.02941	0.0289875
Q8R164	sp|Q8R164|BPHL_MOUSE	Valacyclovir hydrolase Bphl	1.02941	0.0289875
P43274	sp|P43274|H14_MOUSE	Histone H1.4 Hist1h1e	1.02913	0.0287101
P62962	sp|P62962|PROF1_MOUSE	Profilin-1 Pfn1	1.02913	0.0287101
Q61699	sp|Q61699|HS105_MOUSE	Heat shock protein 105 kDa Hsph1	1.02913	0.0287101
P61264	sp|P61264|STX1B_MOUSE	Syntaxin-1B Stx1b	1.02885	0.0284379
P43276	sp|P43276|H15_MOUSE	Histone H1.5 Hist1h1b	1.02857	0.0281709
O35945	sp|O35945|AL1A7_MOUSE	Aldehyde dehydrogenase, cytosolic 1 Aldh1a7	1.02857	0.0281709
Q9JIK5	sp|Q9JIK5|DDX21_MOUSE	Nucleolar RNA helicase 2 Ddx21	1.02857	0.0281709
Q05920	sp|Q05920|PYC_MOUSE	Pyruvate carboxylase, mitochondrial Pc	1.0283	0.0279088
P10649	sp|P10649|GSTM1_MOUSE	Glutathione S-transferase Mu 1 Gstm1	1.0283	0.0279088
Q80UW5	sp|Q80UW5|MRCKG_MOUSE	Serine/threonine-protein kinase MRCK gamma Cdc42bpg	1.0283	0.0279088
P63028	sp|P63028|TCTP_MOUSE	Translationally-controlled tumor protein Tpt1	1.0283	0.0279088
P56480	sp|P56480|ATPB_MOUSE	ATP synthase subunit beta, mitochondrial Atp5b	1.02804	0.0276515
Q8QZY2	sp|Q8QZY2|GLCTK_MOUSE	Glycerate kinase Glyctk	1.02804	0.0276515
P62196	sp|P62196|PRS8_MOUSE	26S protease regulatory subunit 8 Psmc5	1.02804	0.0276515
Q91WT9	sp|Q91WT9|CBS_MOUSE	Cystathionine beta-synthase Cbs	1.02804	0.0276515
Q9WV98	sp|Q9WV98|TIM9_MOUSE	Mitochondrial import inner membrane translocase subunit Tim9 Timm9	1.02804	0.0276515
Q571I9	sp|Q571I9|A16A1_MOUSE	Aldehyde dehydrogenase family 16 member A1 Aldh16a1	1.02804	0.0276515
P08249	sp|P08249|MDHM_MOUSE	Malate dehydrogenase, mitochondrial Mdh2	1.02778	0.027399
Q8BMS1	sp|Q8BMS1|ECHA_MOUSE	Trifunctional enzyme subunit alpha, mitochondrial Hadha	1.02778	0.027399
Q923D2	sp|Q923D2|BLVRB_MOUSE	Flavin reductase (NADPH) Blvrb	1.02778	0.027399
P0C0S6	sp|P0C0S6|H2AZ_MOUSE	Histone H2A.Z H2afz	1.02778	0.027399
Q3THW5	sp|Q3THW5|H2AV_MOUSE	Histone H2A.V H2afv	1.02778	0.027399
Q9DCW4	sp|Q9DCW4|ETFB_MOUSE	Electron transfer flavoprotein subunit beta Etfb	1.02778	0.027399
P10518	sp|P10518|HEM2_MOUSE	Delta-aminolevulinic acid dehydratase Alad	1.02778	0.027399
Q9CPQ8	sp|Q9CPQ8|ATP5L_MOUSE	ATP synthase subunit g, mitochondrial Atp5l	1.02778	0.027399
Q9CPU4	sp|Q9CPU4|MGST3_MOUSE	Microsomal glutathione S-transferase 3 Mgst3	1.02778	0.027399
P16330	sp|P16330|CN37_MOUSE	2&#039;,3&#039;-cyclic-nucleotide 3&#039;-phosphodiesterase Cnp	1.02752	0.027151
Q8BH95	sp|Q8BH95|ECHM_MOUSE	Enoyl-CoA hydratase, mitochondrial Echs1	1.02632	0.0259755
Q60847	sp|Q60847|COCA1_MOUSE	Collagen alpha-1(XII) chain Col12a1	1.02609	0.0257525
Q91VZ6	sp|Q91VZ6|SMAP1_MOUSE	Stromal membrane-associated protein 1 Smap1	1.02532	0.0250013
Q99K85	sp|Q99K85|SERC_MOUSE	Phosphoserine aminotransferase Psat1	1.0241	0.0238106
P47738	sp|P47738|ALDH2_MOUSE	Aldehyde dehydrogenase, mitochondrial Aldh2	1.02381	0.0235305
P10637	sp|P10637|TAU_MOUSE	Microtubule-associated protein tau Mapt	1.02299	0.0227283
Q62186	sp|Q62186|SSRD_MOUSE	Translocon-associated protein subunit delta Ssr4	1.02198	0.02174
Q62188	sp|Q62188|DPYL3_MOUSE	Dihydropyrimidinase-related protein 3 Dpysl3	1.02174	0.0215062
Q9CQ65	sp|Q9CQ65|MTAP_MOUSE	S-methyl-5&#039;-thioadenosine phosphorylase Mtap	1.02151	0.0212774
P52800	sp|P52800|EFNB2_MOUSE	Ephrin-B2 Efnb2	1.02083	0.0206193
P20108	sp|P20108|PRDX3_MOUSE	Thioredoxin-dependent peroxide reductase, mitochondrial Prdx3	1.02	0.0198026
P04919	sp|P04919|B3AT_MOUSE	Band 3 anion transport protein Slc4a1	1.0198	0.0196085
P50516	sp|P50516|VATA_MOUSE	V-type proton ATPase catalytic subunit A Atp6v1a	1.0198	0.0196085
P97298	sp|P97298|PEDF_MOUSE	Pigment epithelium-derived factor Serpinf1	1.0198	0.0196085
Q91W50	sp|Q91W50|CSDE1_MOUSE	Cold shock domain-containing protein E1 Csde1	1.0198	0.0196085
O35381	sp|O35381|AN32A_MOUSE	Acidic leucine-rich nuclear phosphoprotein 32 family member A Anp32a	1.01961	0.0194181
P51174	sp|P51174|ACADL_MOUSE	Long-chain specific acyl-CoA dehydrogenase, mitochondrial Acadl	1.01961	0.0194181
P02468	sp|P02468|LAMC1_MOUSE	Laminin subunit gamma-1 Lamc1	1.01961	0.0194181
Q64213	sp|Q64213|SF01_MOUSE	Splicing factor 1 Sf1	1.01961	0.0194181
P28654	sp|P28654|PGS2_MOUSE	Decorin Dcn	1.01961	0.0194181
P49722	sp|P49722|PSA2_MOUSE	Proteasome subunit alpha type-2 Psma2	1.01961	0.0194181
Q99LC5	sp|Q99LC5|ETFA_MOUSE	Electron transfer flavoprotein subunit alpha, mitochondrial Etfa	1.01942	0.0192314
Q9R0H0	sp|Q9R0H0|ACOX1_MOUSE	Peroxisomal acyl-coenzyme A oxidase 1 Acox1	1.01942	0.0192314
P09411	sp|P09411|PGK1_MOUSE	Phosphoglycerate kinase 1 Pgk1	1.01942	0.0192314
Q61425	sp|Q61425|HCDH_MOUSE	Hydroxyacyl-coenzyme A dehydrogenase, mitochondrial Hadh	1.01942	0.0192314
Q8K2B3	sp|Q8K2B3|DHSA_MOUSE	Succinate dehydrogenase [ubiquinone] flavoprotein subunit, mitochondrial Sdha	1.01942	0.0192314
Q8CAY6	sp|Q8CAY6|THIC_MOUSE	Acetyl-CoA acetyltransferase, cytosolic Acat2	1.01942	0.0192314
Q9DAR7	sp|Q9DAR7|DCPS_MOUSE	m7GpppX diphosphatase Dcps	1.01942	0.0192314
P97372	sp|P97372|PSME2_MOUSE	Proteasome activator complex subunit 2 Psme2	1.01942	0.0192314
Q9CQ26	sp|Q9CQ26|STABP_MOUSE	STAM-binding protein Stambp	1.01942	0.0192314
P41216	sp|P41216|ACSL1_MOUSE	Long-chain-fatty-acid--CoA ligase 1 Acsl1	1.01923	0.0190482
P62631	sp|P62631|EF1A2_MOUSE	Elongation factor 1-alpha 2 Eef1a2	1.01923	0.0190482
P35505	sp|P35505|FAAA_MOUSE	Fumarylacetoacetase Fah	1.01923	0.0190482
Q61598	sp|Q61598|GDIB_MOUSE	Rab GDP dissociation inhibitor beta Gdi2	1.01905	0.0188685
P10126	sp|P10126|EF1A1_MOUSE	Elongation factor 1-alpha 1 Eef1a1	1.01887	0.0186921
P19324	sp|P19324|SERPH_MOUSE	Serpin H1 Serpinh1	1.01887	0.0186921
P52480	sp|P52480|KPYM_MOUSE	Pyruvate kinase isozymes M1/M2 Pkm2	1.01887	0.0186921
Q64727	sp|Q64727|VINC_MOUSE	Vinculin Vcl	1.01887	0.0186921
P31786	sp|P31786|ACBP_MOUSE	Acyl-CoA-binding protein Dbi	1.01887	0.0186921
P15626	sp|P15626|GSTM2_MOUSE	Glutathione S-transferase Mu 2 Gstm2	1.01887	0.0186921
Q91Y97	sp|Q91Y97|ALDOB_MOUSE	Fructose-bisphosphate aldolase B Aldob	1.01887	0.0186921
P20065	sp|P20065|TYB4_MOUSE	Thymosin beta-4 Tmsb4x	1.01887	0.0186921
P05784	sp|P05784|K1C18_MOUSE	Keratin, type I cytoskeletal 18 Krt18	1.01887	0.0186921
Q8C196	sp|Q8C196|CPSM_MOUSE	Carbamoyl-phosphate synthase [ammonia], mitochondrial Cps1	1.01869	0.018519
Q9DBJ1	sp|Q9DBJ1|PGAM1_MOUSE	Phosphoglycerate mutase 1 Pgam1	1.01869	0.018519
P50396	sp|P50396|GDIA_MOUSE	Rab GDP dissociation inhibitor alpha Gdi1	1.01869	0.018519
P34914	sp|P34914|HYES_MOUSE	Epoxide hydrolase 2 Ephx2	1.01869	0.018519
P00329	sp|P00329|ADH1_MOUSE	Alcohol dehydrogenase 1 Adh1	1.01869	0.018519
Q7TQI3	sp|Q7TQI3|OTUB1_MOUSE	Ubiquitin thioesterase OTUB1 Otub1	1.01869	0.018519
Q8R5C5	sp|Q8R5C5|ACTY_MOUSE	Beta-centractin Actr1b	1.01869	0.018519
P19096	sp|P19096|FAS_MOUSE	Fatty acid synthase Fasn	1.01852	0.0183491
P99024	sp|P99024|TBB5_MOUSE	Tubulin beta-5 chain Tubb5	1.01852	0.0183491
P68372	sp|P68372|TBB4B_MOUSE	Tubulin beta-4B chain Tubb4b	1.01852	0.0183491
Q9ERD7	sp|Q9ERD7|TBB3_MOUSE	Tubulin beta-3 chain Tubb3	1.01852	0.0183491
P61982	sp|P61982|1433G_MOUSE	14-3-3 protein gamma Ywhag	1.01852	0.0183491
P21614	sp|P21614|VTDB_MOUSE	Vitamin D-binding protein Gc	1.01852	0.0183491
Q9QXV0	sp|Q9QXV0|PCSK1_MOUSE	ProSAAS Pcsk1n	1.01852	0.0183491
P46460	sp|P46460|NSF_MOUSE	Vesicle-fusing ATPase Nsf	1.01852	0.0183491
Q9CYT6	sp|Q9CYT6|CAP2_MOUSE	Adenylyl cyclase-associated protein 2 Cap2	1.01852	0.0183491
P27661	sp|P27661|H2AX_MOUSE	Histone H2A.x H2afx	1.01835	0.0181823
Q99K48	sp|Q99K48|NONO_MOUSE	Non-POU domain-containing octamer-binding protein Nono	1.01835	0.0181823
P47963	sp|P47963|RL13_MOUSE	60S ribosomal protein L13 Rpl13	1.01835	0.0181823
Q9JKB3	sp|Q9JKB3|DBPA_MOUSE	DNA-binding protein A Csda	1.01818	0.0180185
P62204	sp|P62204|CALM_MOUSE	Calmodulin Calm1	1.01786	0.0176996
P63037	sp|P63037|DNJA1_MOUSE	DnaJ homolog subfamily A member 1 Dnaja1	1.01786	0.0176996
P30681	sp|P30681|HMGB2_MOUSE	High mobility group protein B2 Hmgb2	1.01042	0.0103628
Q9DC69	sp|Q9DC69|NDUA9_MOUSE	NADH dehydrogenase [ubiquinone] 1 alpha subcomplex subunit 9, mitochondrial Ndufa9	1.01042	0.0103628
P63158	sp|P63158|HMGB1_MOUSE	High mobility group protein B1 Hmgb1	1.0101	0.0100503
P23116	sp|P23116|EIF3A_MOUSE	Eukaryotic translation initiation factor 3 subunit A Eif3a	1.0099	0.0098523
Q99JY9	sp|Q99JY9|ARP3_MOUSE	Actin-related protein 3 Actr3	1.0099	0.0098523
Q9D172	sp|Q9D172|ES1_MOUSE	ES1 protein homolog, mitochondrial D10Jhu81e	1.0098	0.00975617
P50518	sp|P50518|VATE1_MOUSE	V-type proton ATPase subunit E 1 Atp6v1e1	1.0098	0.00975617
Q8C1B7	sp|Q8C1B7|SEP11_MOUSE	Septin-11 Sept11	1.00971	0.00966191
O08795	sp|O08795|GLU2B_MOUSE	Glucosidase 2 subunit beta Prkcsh	1.00971	0.00966191
Q9DBE0	sp|Q9DBE0|CSAD_MOUSE	Cysteine sulfinic acid decarboxylase Csad	1.00962	0.00956945
Q04447	sp|Q04447|KCRB_MOUSE	Creatine kinase B-type Ckb	1.00952	0.00947874
P09671	sp|P09671|SODM_MOUSE	Superoxide dismutase [Mn], mitochondrial Sod2	1.00952	0.00947874
Q91ZZ3	sp|Q91ZZ3|SYUB_MOUSE	Beta-synuclein Sncb	1.00952	0.00947874
P06728	sp|P06728|APOA4_MOUSE	Apolipoprotein A-IV Apoa4	1.00943	0.00938974
O70423	sp|O70423|AOC3_MOUSE	Membrane primary amine oxidase Aoc3	1.00943	0.00938974
Q8BWT1	sp|Q8BWT1|THIM_MOUSE	3-ketoacyl-CoA thiolase, mitochondrial Acaa2	1.00943	0.00938974
P50544	sp|P50544|ACADV_MOUSE	Very long-chain specific acyl-CoA dehydrogenase, mitochondrial Acadvl	1.00943	0.00938974
Q8VCH0	sp|Q8VCH0|THIKB_MOUSE	3-ketoacyl-CoA thiolase B, peroxisomal Acaa1b	1.00943	0.00938974
Q00897	sp|Q00897|A1AT4_MOUSE	Alpha-1-antitrypsin 1-4 Serpina1d	1.00943	0.00938974
P63260	sp|P63260|ACTG_MOUSE	Actin, cytoplasmic 2 Actg1	1.00935	0.00930239
P68134	sp|P68134|ACTS_MOUSE	Actin, alpha skeletal muscle Acta1	1.00935	0.00930239
Q9CZM2	sp|Q9CZM2|RL15_MOUSE	60S ribosomal protein L15 Rpl15	1.00935	0.00930239
Q8BFZ3	sp|Q8BFZ3|ACTBL_MOUSE	Beta-actin-like protein 2 Actbl2	1.00926	0.00921666
O54724	sp|O54724|PTRF_MOUSE	Polymerase I and transcript release factor Ptrf	1.00926	0.00921666
Q9DCX2	sp|Q9DCX2|ATP5H_MOUSE	ATP synthase subunit d, mitochondrial Atp5h	1.00926	0.00921666
Q9D1H9	sp|Q9D1H9|MFAP4_MOUSE	Microfibril-associated glycoprotein 4 Mfap4	1.00926	0.00921666
O70493	sp|O70493|SNX12_MOUSE	Sorting nexin-12 Snx12	1.00926	0.00921666
Q64522	sp|Q64522|H2A2B_MOUSE	Histone H2A type 2-B Hist2h2ab	1.00917	0.00913248
Q9QZQ8	sp|Q9QZQ8|H2AY_MOUSE	Core histone macro-H2A.1 H2afy	1.00917	0.00913248
P63017	sp|P63017|HSP7C_MOUSE	Heat shock cognate 71 kDa protein Hspa8	1.00917	0.00913248
P16858	sp|P16858|G3P_MOUSE	Glyceraldehyde-3-phosphate dehydrogenase Gapdh	1.00917	0.00913248
Q9DBG6	sp|Q9DBG6|RPN2_MOUSE	Dolichyl-diphosphooligosaccharide--protein glycosyltransferase subunit 2 Rpn2	1.00917	0.00913248
P54071	sp|P54071|IDHP_MOUSE	Isocitrate dehydrogenase [NADP], mitochondrial Idh2	1.00917	0.00913248
O88428	sp|O88428|PAPS2_MOUSE	Bifunctional 3&#039;-phosphoadenosine 5&#039;-phosphosulfate synthase 2 Papss2	1.00917	0.00913248
P22892	sp|P22892|AP1G1_MOUSE	AP-1 complex subunit gamma-1 Ap1g1	1.00909	0.00904984
P16015	sp|P16015|CAH3_MOUSE	Carbonic anhydrase 3 Ca3	1	0
P02088	sp|P02088|HBB1_MOUSE	Hemoglobin subunit beta-1 Hbb-b1	1	0
P04117	sp|P04117|FABP4_MOUSE	Fatty acid-binding protein, adipocyte Fabp4	1	0
P63268	sp|P63268|ACTH_MOUSE	Actin, gamma-enteric smooth muscle Actg2	1	0
O88569	sp|O88569|ROA2_MOUSE	Heterogeneous nuclear ribonucleoproteins A2/B1 Hnrnpa2b1	1	0
O08553	sp|O08553|DPYL2_MOUSE	Dihydropyrimidinase-related protein 2 Dpysl2	1	0
P08228	sp|P08228|SODC_MOUSE	Superoxide dismutase [Cu-Zn] Sod1	1	0
Q01853	sp|Q01853|TERA_MOUSE	Transitional endoplasmic reticulum ATPase Vcp	1	0
Q8BMF4	sp|Q8BMF4|ODP2_MOUSE	Dihydrolipoyllysine-residue acetyltransferase component of pyruvate dehydrogenase complex, mitochondrial Dlat	1	0
P12710	sp|P12710|FABPL_MOUSE	Fatty acid-binding protein, liver Fabp1	1	0
P35486	sp|P35486|ODPA_MOUSE	Pyruvate dehydrogenase E1 component subunit alpha, somatic form, mitochondrial Pdha1	1	0
P47199	sp|P47199|QOR_MOUSE	Quinone oxidoreductase Cryz	1	0
O88456	sp|O88456|CPNS1_MOUSE	Calpain small subunit 1 Capns1	1	0
P19157	sp|P19157|GSTP1_MOUSE	Glutathione S-transferase P 1 Gstp1	1	0
P34884	sp|P34884|MIF_MOUSE	Macrophage migration inhibitory factor Mif	1	0
Q9DBT9	sp|Q9DBT9|M2GD_MOUSE	Dimethylglycine dehydrogenase, mitochondrial Dmgdh	1	0
P24472	sp|P24472|GSTA4_MOUSE	Glutathione S-transferase A4 Gsta4	1	0
P49817	sp|P49817|CAV1_MOUSE	Caveolin-1 Cav1	1	0
P08121	sp|P08121|CO3A1_MOUSE	Collagen alpha-1(III) chain Col3a1	1	0
P28474	sp|P28474|ADHX_MOUSE	Alcohol dehydrogenase class-3 Adh5	1	0
Q8K0E8	sp|Q8K0E8|FIBB_MOUSE	Fibrinogen beta chain Fgb	1	0
P70333	sp|P70333|HNRH2_MOUSE	Heterogeneous nuclear ribonucleoprotein H2 Hnrnph2	1	0
O89086	sp|O89086|RBM3_MOUSE	Putative RNA-binding protein 3 Rbm3	1	0
Q8VEK3	sp|Q8VEK3|HNRPU_MOUSE	Heterogeneous nuclear ribonucleoprotein U Hnrnpu	1	0
O88844	sp|O88844|IDHC_MOUSE	Isocitrate dehydrogenase [NADP] cytoplasmic Idh1	1	0
P08553	sp|P08553|NFM_MOUSE	Neurofilament medium polypeptide Nefm	1	0
P19536	sp|P19536|COX5B_MOUSE	Cytochrome c oxidase subunit 5B, mitochondrial Cox5b	1	0
P24369	sp|P24369|PPIB_MOUSE	Peptidyl-prolyl cis-trans isomerase B Ppib	1	0
P50637	sp|P50637|TSPO_MOUSE	Translocator protein Tspo	1	0
O35887	sp|O35887|CALU_MOUSE	Calumenin Calu	1	0
P62918	sp|P62918|RL8_MOUSE	60S ribosomal protein L8 Rpl8	1	0
Q60692	sp|Q60692|PSB6_MOUSE	Proteasome subunit beta type-6 Psmb6	1	0
Q91VR5	sp|Q91VR5|DDX1_MOUSE	ATP-dependent RNA helicase DDX1 Ddx1	1	0
P70195	sp|P70195|PSB7_MOUSE	Proteasome subunit beta type-7 Psmb7	1	0
Q6A068	sp|Q6A068|CDC5L_MOUSE	Cell division cycle 5-like protein Cdc5l	1	0
Q9CPU0	sp|Q9CPU0|LGUL_MOUSE	Lactoylglutathione lyase Glo1	1	0
Q9CQE8	sp|Q9CQE8|CN166_MOUSE	UPF0568 protein C14orf166 homolog	1	0
Q8C2Q3	sp|Q8C2Q3|RBM14_MOUSE	RNA-binding protein 14 Rbm14	1	0
P0C7L0	sp|P0C7L0|WIPF3_MOUSE	WAS/WASL-interacting protein family member 3 Wipf3	1	0
P21271	sp|P21271|MYO5B_MOUSE	Unconventional myosin-Vb Myo5b	1	0
P61759	sp|P61759|PFD3_MOUSE	Prefoldin subunit 3 Vbp1	1	0
P62858	sp|P62858|RS28_MOUSE	40S ribosomal protein S28 Rps28	1	0
Q640R3	sp|Q640R3|HECAM_MOUSE	Hepatocyte cell adhesion molecule Hepacam	1	0
Q5SRX1	sp|Q5SRX1|TM1L2_MOUSE	TOM1-like protein 2 Tom1l2	1	0
Q61545	sp|Q61545|EWS_MOUSE	RNA-binding protein EWS Ewsr1	1	0
Q9D9V3	sp|Q9D9V3|ECHD1_MOUSE	Ethylmalonyl-CoA decarboxylase Echdc1	1	0
Q8BG05	sp|Q8BG05|ROA3_MOUSE	Heterogeneous nuclear ribonucleoprotein A3 Hnrnpa3	0.990909	-0.00913248
P29699	sp|P29699|FETUA_MOUSE	Alpha-2-HS-glycoprotein Ahsg	0.990826	-0.00921666
Q62009	sp|Q62009|POSTN_MOUSE	Periostin Postn	0.990826	-0.00921666
P63101	sp|P63101|1433Z_MOUSE	14-3-3 protein zeta/delta Ywhaz	0.990826	-0.00921666
P11725	sp|P11725|OTC_MOUSE	Ornithine carbamoyltransferase, mitochondrial Otc	0.990826	-0.00921666
P20029	sp|P20029|GRP78_MOUSE	78 kDa glucose-regulated protein Hspa5	0.990741	-0.00930239
Q03311	sp|Q03311|CHLE_MOUSE	Cholinesterase Bche	0.990741	-0.00930239
Q8R3V5	sp|Q8R3V5|SHLB2_MOUSE	Endophilin-B2 Sh3glb2	0.990741	-0.00930239
Q8CGN5	sp|Q8CGN5|PLIN1_MOUSE	Perilipin-1 Plin1	0.990654	-0.00938974
Q03265	sp|Q03265|ATPA_MOUSE	ATP synthase subunit alpha, mitochondrial Atp5a1	0.990654	-0.00938974
P19639	sp|P19639|GSTM4_MOUSE	Glutathione S-transferase Mu 3 Gstm3	0.990654	-0.00938974
P62751	sp|P62751|RL23A_MOUSE	60S ribosomal protein L23a Rpl23a	0.990654	-0.00938974
P17751	sp|P17751|TPIS_MOUSE	Triosephosphate isomerase Tpi1	0.990566	-0.00947874
Q9D8N0	sp|Q9D8N0|EF1G_MOUSE	Elongation factor 1-gamma Eef1g	0.990566	-0.00947874
Q9CQX8	sp|Q9CQX8|RT36_MOUSE	28S ribosomal protein S36, mitochondrial Mrps36	0.990566	-0.00947874
Q9CXW4	sp|Q9CXW4|RL11_MOUSE	60S ribosomal protein L11 Rpl11	0.990566	-0.00947874
O35206	sp|O35206|COFA1_MOUSE	Collagen alpha-1(XV) chain Col15a1	0.990476	-0.00956945
P26043	sp|P26043|RADI_MOUSE	Radixin Rdx	0.990476	-0.00956945
P98078	sp|P98078|DAB2_MOUSE	Disabled homolog 2 Dab2	0.990476	-0.00956945
Q8K297	sp|Q8K297|GT251_MOUSE	Procollagen galactosyltransferase 1 Glt25d1	0.990476	-0.00956945
Q61830	sp|Q61830|MRC1_MOUSE	Macrophage mannose receptor 1 Mrc1	0.990476	-0.00956945
Q62523	sp|Q62523|ZYX_MOUSE	Zyxin Zyx	0.990385	-0.00966191
P54869	sp|P54869|HMCS2_MOUSE	Hydroxymethylglutaryl-CoA synthase, mitochondrial Hmgcs2	0.990385	-0.00966191
Q62446	sp|Q62446|FKBP3_MOUSE	Peptidyl-prolyl cis-trans isomerase FKBP3 Fkbp3	0.990385	-0.00966191
P21278	sp|P21278|GNA11_MOUSE	Guanine nucleotide-binding protein subunit alpha-11 Gna11	0.990385	-0.00966191
Q9CQN6	sp|Q9CQN6|TM14C_MOUSE	Transmembrane protein 14C Tmem14c	0.990385	-0.00966191
Q9DCD0	sp|Q9DCD0|6PGD_MOUSE	6-phosphogluconate dehydrogenase, decarboxylating Pgd	0.990291	-0.00975617
P32020	sp|P32020|NLTP_MOUSE	Non-specific lipid-transfer protein Scp2	0.99	-0.0100503
P11499	sp|P11499|HS90B_MOUSE	Heat shock protein HSP 90-beta Hsp90ab1	0.989899	-0.0101524
Q99MN1	sp|Q99MN1|SYK_MOUSE	Lysine--tRNA ligase Kars	0.989899	-0.0101524
Q9JKF1	sp|Q9JKF1|IQGA1_MOUSE	Ras GTPase-activating-like protein IQGAP1 Iqgap1	0.989796	-0.0102565
Q8K4Z3	sp|Q8K4Z3|NNRE_MOUSE	NAD(P)H-hydrate epimerase Apoa1bp	0.989691	-0.0103628
Q9QXF8	sp|Q9QXF8|GNMT_MOUSE	Glycine N-methyltransferase Gnmt	0.989247	-0.0108109
P02301	sp|P02301|H3C_MOUSE	Histone H3.3C H3f3c	0.988764	-0.0112996
P84244	sp|P84244|H33_MOUSE	Histone H3.3 H3f3a	0.988764	-0.0112996
P10493	sp|P10493|NID1_MOUSE	Nidogen-1 Nid1	0.982456	-0.0176996
Q6PDM2	sp|Q6PDM2|SRSF1_MOUSE	Serine/arginine-rich splicing factor 1 Srsf1	0.982456	-0.0176996
O09173	sp|O09173|HGD_MOUSE	Homogentisate 1,2-dioxygenase Hgd	0.982301	-0.0178576
P46978	sp|P46978|STT3A_MOUSE	Dolichyl-diphosphooligosaccharide--protein glycosyltransferase subunit STT3A Stt3a	0.982143	-0.0180185
O35593	sp|O35593|PSDE_MOUSE	26S proteasome non-ATPase regulatory subunit 14 Psmd14	0.981982	-0.0181823
Q64374	sp|Q64374|RGN_MOUSE	Regucalcin Rgn	0.981818	-0.0183491
Q6PDL0	sp|Q6PDL0|DC1L2_MOUSE	Cytoplasmic dynein 1 light intermediate chain 2 Dync1li2	0.981818	-0.0183491
P10853	sp|P10853|H2B1F_MOUSE	Histone H2B type 1-F/J/L Hist1h2bf	0.981651	-0.018519
P10854	sp|P10854|H2B1M_MOUSE	Histone H2B type 1-M Hist1h2bm	0.981651	-0.018519
Q64475	sp|Q64475|H2B1B_MOUSE	Histone H2B type 1-B Hist1h2bb	0.981651	-0.018519
Q64478	sp|Q64478|H2B1H_MOUSE	Histone H2B type 1-H Hist1h2bh	0.981651	-0.018519
Q64524	sp|Q64524|H2B2E_MOUSE	Histone H2B type 2-E Hist2h2be	0.981651	-0.018519
Q64525	sp|Q64525|H2B2B_MOUSE	Histone H2B type 2-B Hist2h2bb	0.981651	-0.018519
Q6ZWY9	sp|Q6ZWY9|H2B1C_MOUSE	Histone H2B type 1-C/E/G Hist1h2bc	0.981651	-0.018519
Q8CGP0	sp|Q8CGP0|H2B3B_MOUSE	Histone H2B type 3-B Hist3h2bb	0.981651	-0.018519
Q8CGP1	sp|Q8CGP1|H2B1K_MOUSE	Histone H2B type 1-K Hist1h2bk	0.981651	-0.018519
Q8CGP2	sp|Q8CGP2|H2B1P_MOUSE	Histone H2B type 1-P Hist1h2bp	0.981651	-0.018519
Q9D2U9	sp|Q9D2U9|H2B3A_MOUSE	Histone H2B type 3-A Hist3h2ba	0.981651	-0.018519
Q99PV0	sp|Q99PV0|PRP8_MOUSE	Pre-mRNA-processing-splicing factor 8 Prpf8	0.981651	-0.018519
P27773	sp|P27773|PDIA3_MOUSE	Protein disulfide-isomerase A3 Pdia3	0.981481	-0.0186921
Q9WVL0	sp|Q9WVL0|MAAI_MOUSE	Maleylacetoacetate isomerase Gstz1	0.981481	-0.0186921
P07310	sp|P07310|KCRM_MOUSE	Creatine kinase M-type Ckm	0.981481	-0.0186921
P61961	sp|P61961|UFM1_MOUSE	Ubiquitin-fold modifier 1 Ufm1	0.981481	-0.0186921
P11404	sp|P11404|FABPH_MOUSE	Fatty acid-binding protein, heart Fabp3	0.981481	-0.0186921
P17182	sp|P17182|ENOA_MOUSE	Alpha-enolase Eno1	0.981308	-0.0188685
P51885	sp|P51885|LUM_MOUSE	Lumican Lum	0.981308	-0.0188685
Q9CQH7	sp|Q9CQH7|BT3L4_MOUSE	Transcription factor BTF3 homolog 4 Btf3l4	0.981308	-0.0188685
P02089	sp|P02089|HBB2_MOUSE	Hemoglobin subunit beta-2 Hbb-b2	0.981132	-0.0190482
Q8R081	sp|Q8R081|HNRPL_MOUSE	Heterogeneous nuclear ribonucleoprotein L Hnrnpl	0.981132	-0.0190482
Q9EQ61	sp|Q9EQ61|PESC_MOUSE	Pescadillo homolog Pes1	0.981132	-0.0190482
Q8VCW8	sp|Q8VCW8|ACSF2_MOUSE	Acyl-CoA synthetase family member 2, mitochondrial Acsf2	0.980952	-0.0192314
Q8BJD1	sp|Q8BJD1|ITIH5_MOUSE	Inter-alpha-trypsin inhibitor heavy chain H5 Itih5	0.980952	-0.0192314
Q8BH64	sp|Q8BH64|EHD2_MOUSE	EH domain-containing protein 2 Ehd2	0.980769	-0.0194181
P05201	sp|P05201|AATC_MOUSE	Aspartate aminotransferase, cytoplasmic Got1	0.980769	-0.0194181
Q9D8E6	sp|Q9D8E6|RL4_MOUSE	60S ribosomal protein L4 Rpl4	0.980769	-0.0194181
O08601	sp|O08601|MTP_MOUSE	Microsomal triglyceride transfer protein large subunit Mttp	0.980769	-0.0194181
Q9D8B3	sp|Q9D8B3|CHM4B_MOUSE	Charged multivesicular body protein 4b Chmp4b	0.980769	-0.0194181
O55222	sp|O55222|ILK_MOUSE	Integrin-linked protein kinase Ilk	0.980769	-0.0194181
P42208	sp|P42208|SEPT2_MOUSE	Septin-2 Sept2	0.979798	-0.0204089
Q08091	sp|Q08091|CNN1_MOUSE	Calponin-1 Cnn1	0.978261	-0.0219789
Q8R2Y2	sp|Q8R2Y2|MUC18_MOUSE	Cell surface glycoprotein MUC18 Mcam	0.978022	-0.0222231
Q8QZY9	sp|Q8QZY9|SF3B4_MOUSE	Splicing factor 3B subunit 4 Sf3b4	0.977273	-0.0229895
Q9CPY7	sp|Q9CPY7|AMPL_MOUSE	Cytosol aminopeptidase Lap3	0.975	-0.0253178
P37804	sp|P37804|TAGL_MOUSE	Transgelin Tagln	0.973684	-0.0266682
P47955	sp|P47955|RLA1_MOUSE	60S acidic ribosomal protein P1 Rplp1	0.973684	-0.0266682
Q9QXX4	sp|Q9QXX4|CMC2_MOUSE	Calcium-binding mitochondrial carrier protein Aralar2 Slc25a13	0.973451	-0.0269075
P23927	sp|P23927|CRYAB_MOUSE	Alpha-crystallin B chain Cryab	0.973214	-0.027151
P10630	sp|P10630|IF4A2_MOUSE	Eukaryotic initiation factor 4A-II Eif4a2	0.972973	-0.027399
P14094	sp|P14094|AT1B1_MOUSE	Sodium/potassium-transporting ATPase subunit beta-1 Atp1b1	0.972973	-0.027399
Q9D2V7	sp|Q9D2V7|CORO7_MOUSE	Coronin-7 Coro7	0.972973	-0.027399
Q68FD5	sp|Q68FD5|CLH_MOUSE	Clathrin heavy chain 1 Cltc	0.972727	-0.0276515
P30412	sp|P30412|PPIC_MOUSE	Peptidyl-prolyl cis-trans isomerase C Ppic	0.972477	-0.0279088
Q99MD9	sp|Q99MD9|NASP_MOUSE	Nuclear autoantigenic sperm protein Nasp	0.972477	-0.0279088
P62264	sp|P62264|RS14_MOUSE	40S ribosomal protein S14 Rps14	0.972477	-0.0279088
Q3UMU9	sp|Q3UMU9|HDGR2_MOUSE	Hepatoma-derived growth factor-related protein 2 Hdgfrp2	0.972477	-0.0279088
P28271	sp|P28271|ACOC_MOUSE	Cytoplasmic aconitate hydratase Aco1	0.972222	-0.0281709
P11087	sp|P11087|CO1A1_MOUSE	Collagen alpha-1(I) chain Col1a1	0.971963	-0.0284379
P58252	sp|P58252|EF2_MOUSE	Elongation factor 2 Eef2	0.971963	-0.0284379
Q8VCM7	sp|Q8VCM7|FIBG_MOUSE	Fibrinogen gamma chain Fgg	0.971963	-0.0284379
Q9D6F9	sp|Q9D6F9|TBB4A_MOUSE	Tubulin beta-4A chain Tubb4a	0.971963	-0.0284379
P61979	sp|P61979|HNRPK_MOUSE	Heterogeneous nuclear ribonucleoprotein K Hnrnpk	0.971963	-0.0284379
O35129	sp|O35129|PHB2_MOUSE	Prohibitin-2 Phb2	0.971963	-0.0284379
Q3TLH4	sp|Q3TLH4|PRC2C_MOUSE	Protein PRRC2C Prrc2c	0.971963	-0.0284379
P45376	sp|P45376|ALDR_MOUSE	Aldose reductase Akr1b1	0.971698	-0.0287101
Q61171	sp|Q61171|PRDX2_MOUSE	Peroxiredoxin-2 Prdx2	0.971429	-0.0289875
P17183	sp|P17183|ENOG_MOUSE	Gamma-enolase Eno2	0.971154	-0.0292704
Q8BFW7	sp|Q8BFW7|LPP_MOUSE	Lipoma-preferred partner homolog Lpp	0.971154	-0.0292704
Q60759	sp|Q60759|GCDH_MOUSE	Glutaryl-CoA dehydrogenase, mitochondrial Gcdh	0.971154	-0.0292704
O35737	sp|O35737|HNRH1_MOUSE	Heterogeneous nuclear ribonucleoprotein H Hnrnph1	0.970588	-0.029853
P63168	sp|P63168|DYL1_MOUSE	Dynein light chain 1, cytoplasmic Dynll1	0.969072	-0.0314162
Q9DCD2	sp|Q9DCD2|SYF1_MOUSE	Pre-mRNA-splicing factor SYF1 Xab2	0.968254	-0.0322609
Q9D0I9	sp|Q9D0I9|SYRC_MOUSE	Arginine--tRNA ligase, cytoplasmic Rars	0.966942	-0.0336166
Q06986	sp|Q06986|SIAH2_MOUSE	E3 ubiquitin-protein ligase SIAH2 Siah2	0.966667	-0.0339016
P47962	sp|P47962|RL5_MOUSE	60S ribosomal protein L5 Rpl5	0.966292	-0.0342891
P32848	sp|P32848|PRVA_MOUSE	Parvalbumin alpha Pvalb	0.964912	-0.0357181
P50462	sp|P50462|CSRP3_MOUSE	Cysteine and glycine-rich protein 3 Csrp3	0.964912	-0.0357181
Q9CYC6	sp|Q9CYC6|DCP2_MOUSE	m7GpppN-mRNA hydrolase Dcp2	0.964602	-0.0360399
Q8K310	sp|Q8K310|MATR3_MOUSE	Matrin-3 Matr3	0.964286	-0.0363676
P61022	sp|P61022|CHP1_MOUSE	Calcium-binding protein p22 Chp	0.963964	-0.0367014
P40124	sp|P40124|CAP1_MOUSE	Adenylyl cyclase-associated protein 1 Cap1	0.963964	-0.0367014
P50247	sp|P50247|SAHH_MOUSE	Adenosylhomocysteinase Ahcy	0.963964	-0.0367014
P70349	sp|P70349|HINT1_MOUSE	Histidine triad nucleotide-binding protein 1 Hint1	0.963636	-0.0370413
Q8BWP5	sp|Q8BWP5|TTPA_MOUSE	Alpha-tocopherol transfer protein Ttpa	0.963636	-0.0370413
P09103	sp|P09103|PDIA1_MOUSE	Protein disulfide-isomerase P4hb	0.963303	-0.0373875
Q922R8	sp|Q922R8|PDIA6_MOUSE	Protein disulfide-isomerase A6 Pdia6	0.963303	-0.0373875
P62960	sp|P62960|YBOX1_MOUSE	Nuclease-sensitive element-binding protein 1 Ybx1	0.963303	-0.0373875
Q9R0P9	sp|Q9R0P9|UCHL1_MOUSE	Ubiquitin carboxyl-terminal hydrolase isozyme L1 Uchl1	0.963303	-0.0373875
O08539	sp|O08539|BIN1_MOUSE	Myc box-dependent-interacting protein 1 Bin1	0.963303	-0.0373875
P99027	sp|P99027|RLA2_MOUSE	60S acidic ribosomal protein P2 Rplp2	0.962963	-0.0377403
P00405	sp|P00405|COX2_MOUSE	Cytochrome c oxidase subunit 2 Mtco2	0.962963	-0.0377403
P08730	sp|P08730|K1C13_MOUSE	Keratin, type I cytoskeletal 13 Krt13	0.962963	-0.0377403
Q3TDQ1	sp|Q3TDQ1|STT3B_MOUSE	Dolichyl-diphosphooligosaccharide--protein glycosyltransferase subunit STT3B Stt3b	0.962963	-0.0377403
Q8CGA0	sp|Q8CGA0|PPM1F_MOUSE	Protein phosphatase 1F Ppm1f	0.962963	-0.0377403
Q60597	sp|Q60597|ODO1_MOUSE	2-oxoglutarate dehydrogenase, mitochondrial Ogdh	0.962617	-0.0380998
Q80X90	sp|Q80X90|FLNB_MOUSE	Filamin-B Flnb	0.962617	-0.0380998
Q8BK64	sp|Q8BK64|AHSA1_MOUSE	Activator of 90 kDa heat shock protein ATPase homolog 1 Ahsa1	0.962617	-0.0380998
P07356	sp|P07356|ANXA2_MOUSE	Annexin A2 Anxa2	0.962264	-0.0384663
P17563	sp|P17563|SBP1_MOUSE	Selenium-binding protein 1 Selenbp1	0.962264	-0.0384663
Q62417	sp|Q62417|SRBS1_MOUSE	Sorbin and SH3 domain-containing protein 1 Sorbs1	0.962264	-0.0384663
P47911	sp|P47911|RL6_MOUSE	60S ribosomal protein L6 Rpl6	0.962264	-0.0384663
Q62084	sp|Q62084|PP14B_MOUSE	Protein phosphatase 1 regulatory subunit 14B Ppp1r14b	0.962264	-0.0384663
Q61838	sp|Q61838|A2M_MOUSE	Alpha-2-macroglobulin A2m	0.961905	-0.0388398
Q9CPR4	sp|Q9CPR4|RL17_MOUSE	60S ribosomal protein L17 Rpl17	0.961905	-0.0388398
Q8R0Y6	sp|Q8R0Y6|AL1L1_MOUSE	Cytosolic 10-formyltetrahydrofolate dehydrogenase Aldh1l1	0.961538	-0.0392207
Q9CQZ5	sp|Q9CQZ5|NDUA6_MOUSE	NADH dehydrogenase [ubiquinone] 1 alpha subcomplex subunit 6 Ndufa6	0.961165	-0.0396091
Q8VIJ6	sp|Q8VIJ6|SFPQ_MOUSE	Splicing factor, proline- and glutamine-rich Sfpq	0.960396	-0.0404095
Q8BHN3	sp|Q8BHN3|GANAB_MOUSE	Neutral alpha-glucosidase AB Ganab	0.960317	-0.0404914
Q8C8T7	sp|Q8C8T7|PPR28_MOUSE	Protein phosphatase 1 regulatory subunit 28 Elfn1	0.959677	-0.0411581
Q8K183	sp|Q8K183|PDXK_MOUSE	Pyridoxal kinase Pdxk	0.959596	-0.041243
Q6PDQ2	sp|Q6PDQ2|CHD4_MOUSE	Chromodomain-helicase-DNA-binding protein 4 Chd4	0.959184	-0.0416727
Q80YN3	sp|Q80YN3|BCAS1_MOUSE	Breast carcinoma-amplified sequence 1 homolog Bcas1	0.956522	-0.0444518
Q8R409	sp|Q8R409|HEXI1_MOUSE	Protein HEXIM1 Hexim1	0.95614	-0.0448506
Q9JKR6	sp|Q9JKR6|HYOU1_MOUSE	Hypoxia up-regulated protein 1 Hyou1	0.95614	-0.0448506
Q8BH59	sp|Q8BH59|CMC1_MOUSE	Calcium-binding mitochondrial carrier protein Aralar1 Slc25a12	0.956044	-0.0449514
Q61599	sp|Q61599|GDIR2_MOUSE	Rho GDP-dissociation inhibitor 2 Arhgdib	0.956044	-0.0449514
Q920Q6	sp|Q920Q6|MSI2H_MOUSE	RNA-binding protein Musashi homolog 2 Msi2	0.956044	-0.0449514
P84104	sp|P84104|SRSF3_MOUSE	Serine/arginine-rich splicing factor 3 Srsf3	0.955357	-0.04567
Q8C0C7	sp|Q8C0C7|SYFA_MOUSE	Phenylalanine--tRNA ligase alpha subunit Farsa	0.955357	-0.04567
Q91Z53	sp|Q91Z53|GRHPR_MOUSE	Glyoxylate reductase/hydroxypyruvate reductase Grhpr	0.954955	-0.0460911
Q9CZ13	sp|Q9CZ13|QCR1_MOUSE	Cytochrome b-c1 complex subunit 1, mitochondrial Uqcrc1	0.954545	-0.04652
P11798	sp|P11798|KCC2A_MOUSE	Calcium/calmodulin-dependent protein kinase type II subunit alpha Camk2a	0.954545	-0.04652
P28652	sp|P28652|KCC2B_MOUSE	Calcium/calmodulin-dependent protein kinase type II subunit beta Camk2b	0.954545	-0.04652
Q6PHZ2	sp|Q6PHZ2|KCC2D_MOUSE	Calcium/calmodulin-dependent protein kinase type II subunit delta Camk2d	0.954545	-0.04652
Q923T9	sp|Q923T9|KCC2G_MOUSE	Calcium/calmodulin-dependent protein kinase type II subunit gamma Camk2g	0.954545	-0.04652
P54320	sp|P54320|ELN_MOUSE	Elastin Eln	0.954128	-0.046957
Q8CDN6	sp|Q8CDN6|TXNL1_MOUSE	Thioredoxin-like protein 1 Txnl1	0.953704	-0.0474022
Q9CXW3	sp|Q9CXW3|CYBP_MOUSE	Calcyclin-binding protein Cacybp	0.953271	-0.047856
P57780	sp|P57780|ACTN4_MOUSE	Alpha-actinin-4 Actn4	0.95283	-0.0483186
Q04857	sp|Q04857|CO6A1_MOUSE	Collagen alpha-1(VI) chain Col6a1	0.95283	-0.0483186
Q8VDD5	sp|Q8VDD5|MYH9_MOUSE	Myosin-9 Myh9	0.95283	-0.0483186
Q91YI0	sp|Q91YI0|ARLY_MOUSE	Argininosuccinate lyase Asl	0.95283	-0.0483186
Q9CZU6	sp|Q9CZU6|CISY_MOUSE	Citrate synthase, mitochondrial Cs	0.952381	-0.0487902
P16125	sp|P16125|LDHB_MOUSE	L-lactate dehydrogenase B chain Ldhb	0.952381	-0.0487902
P42932	sp|P42932|TCPQ_MOUSE	T-complex protein 1 subunit theta Cct8	0.952381	-0.0487902
Q9Z2X1	sp|Q9Z2X1|HNRPF_MOUSE	Heterogeneous nuclear ribonucleoprotein F Hnrnpf	0.950495	-0.0507723
Q61548	sp|Q61548|AP180_MOUSE	Clathrin coat assembly protein AP180 Snap91	0.95	-0.0512933
P62267	sp|P62267|RS23_MOUSE	40S ribosomal protein S23 Rps23	0.95	-0.0512933
Q6ZQK0	sp|Q6ZQK0|CNDD3_MOUSE	Condensin-2 complex subunit D3 Ncapd3	0.94898	-0.052368
P51410	sp|P51410|RL9_MOUSE	60S ribosomal protein L9 Rpl9	0.948718	-0.0526437
Q9CQ92	sp|Q9CQ92|FIS1_MOUSE	Mitochondrial fission 1 protein Fis1	0.947917	-0.0534887
O09061	sp|O09061|PSB1_MOUSE	Proteasome subunit beta type-1 Psmb1	0.947826	-0.0535842
Q8CI94	sp|Q8CI94|PYGB_MOUSE	Glycogen phosphorylase, brain form Pygb	0.947368	-0.0540672
O35639	sp|O35639|ANXA3_MOUSE	Annexin A3 Anxa3	0.946903	-0.054559
Q9D0M3	sp|Q9D0M3|CY1_MOUSE	Cytochrome c1, heme protein, mitochondrial Cyc1	0.945455	-0.0560895
Q60737	sp|Q60737|CSK21_MOUSE	Casein kinase II subunit alpha Csnk2a1	0.945455	-0.0560895
P68433	sp|P68433|H31_MOUSE	Histone H3.1 Hist1h3a	0.944954	-0.0566189
Q9CZ44	sp|Q9CZ44|NSF1C_MOUSE	NSFL1 cofactor p47 Nsfl1c	0.944954	-0.0566189
P26443	sp|P26443|DHE3_MOUSE	Glutamate dehydrogenase 1, mitochondrial Glud1	0.944444	-0.0571584
Q01405	sp|Q01405|SC23A_MOUSE	Protein transport protein Sec23A Sec23a	0.943925	-0.0577083
Q78YZ6	sp|Q78YZ6|SCOC_MOUSE	Short coiled-coil protein Scoc	0.94382	-0.0578196
P06745	sp|P06745|G6PI_MOUSE	Glucose-6-phosphate isomerase Gpi	0.942857	-0.0588405
Q9D1A2	sp|Q9D1A2|CNDP2_MOUSE	Cytosolic non-specific dipeptidase Cndp2	0.942857	-0.0588405
Q9D1G1	sp|Q9D1G1|RAB1B_MOUSE	Ras-related protein Rab-1B Rab1b	0.941748	-0.060018
Q60675	sp|Q60675|LAMA2_MOUSE	Laminin subunit alpha-2 Lama2	0.941748	-0.060018
P62774	sp|P62774|MTPN_MOUSE	Myotrophin Mtpn	0.941748	-0.060018
O88696	sp|O88696|CLPP_MOUSE	Putative ATP-dependent Clp protease proteolytic subunit, mitochondrial Clpp	0.940594	-0.0612436
Q9QZ11	sp|Q9QZ11|EXO1_MOUSE	Exonuclease 1 Exo1	0.940171	-0.0616936
Q8QZT1	sp|Q8QZT1|THIL_MOUSE	Acetyl-CoA acetyltransferase, mitochondrial Acat1	0.939655	-0.0622423
P50136	sp|P50136|ODBA_MOUSE	2-oxoisovalerate dehydrogenase subunit alpha, mitochondrial Bckdha	0.939655	-0.0622423
Q9D0F3	sp|Q9D0F3|LMAN1_MOUSE	Protein ERGIC-53 Lman1	0.93913	-0.0628009
P47753	sp|P47753|CAZA1_MOUSE	F-actin-capping protein subunit alpha-1 Capza1	0.938776	-0.0631789
Q921F2	sp|Q921F2|TADBP_MOUSE	TAR DNA-binding protein 43 Tardbp	0.938596	-0.0633696
P80317	sp|P80317|TCPZ_MOUSE	T-complex protein 1 subunit zeta Cct6a	0.938596	-0.0633696
P70296	sp|P70296|PEBP1_MOUSE	Phosphatidylethanolamine-binding protein 1 Pebp1	0.9375	-0.0645385
P35564	sp|P35564|CALX_MOUSE	Calnexin Canx	0.9375	-0.0645385
Q8VDM6	sp|Q8VDM6|HNRL1_MOUSE	Heterogeneous nuclear ribonucleoprotein U-like protein 1 Hnrnpul1	0.9375	-0.0645385
Q9ESB3	sp|Q9ESB3|HRG_MOUSE	Histidine-rich glycoprotein Hrg	0.9375	-0.0645385
Q99KP6	sp|Q99KP6|PRP19_MOUSE	Pre-mRNA-processing factor 19 Prpf19	0.9375	-0.0645385
P46660	sp|P46660|AINX_MOUSE	Alpha-internexin Ina	0.936937	-0.0651393
Q9QYR6	sp|Q9QYR6|MAP1A_MOUSE	Microtubule-associated protein 1A Map1a	0.936937	-0.0651393
Q6P1B1	sp|Q6P1B1|XPP1_MOUSE	Xaa-Pro aminopeptidase 1 Xpnpep1	0.936937	-0.0651393
Q02053	sp|Q02053|UBA1_MOUSE	Ubiquitin-like modifier-activating enzyme 1 Uba1	0.936364	-0.0657514
Q6P5E4	sp|Q6P5E4|UGGG1_MOUSE	UDP-glucose:glycoprotein glucosyltransferase 1 Uggt1	0.936364	-0.0657514
P48036	sp|P48036|ANXA5_MOUSE	Annexin A5 Anxa5	0.93578	-0.0663751
Q68FL4	sp|Q68FL4|SAHH3_MOUSE	Putative adenosylhomocysteinase 3 Ahcyl2	0.93578	-0.0663751
Q810U4	sp|Q810U4|NRCAM_MOUSE	Neuronal cell adhesion molecule Nrcam	0.93578	-0.0663751
P01942	sp|P01942|HBA_MOUSE	Hemoglobin subunit alpha Hba	0.935185	-0.0670107
P08113	sp|P08113|ENPL_MOUSE	Endoplasmin Hsp90b1	0.935185	-0.0670107
P60867	sp|P60867|RS20_MOUSE	40S ribosomal protein S20 Rps20	0.935185	-0.0670107
P00493	sp|P00493|HPRT_MOUSE	Hypoxanthine-guanine phosphoribosyltransferase Hprt1	0.935185	-0.0670107
Q91YP2	sp|Q91YP2|NEUL_MOUSE	Neurolysin, mitochondrial Nln	0.934579	-0.0676586
Q7TPR4	sp|Q7TPR4|ACTN1_MOUSE	Alpha-actinin-1 Actn1	0.933962	-0.0683192
P19783	sp|P19783|COX41_MOUSE	Cytochrome c oxidase subunit 4 isoform 1, mitochondrial Cox4i1	0.933884	-0.0684027
P01027	sp|P01027|CO3_MOUSE	Complement C3 C3	0.933333	-0.0689929
Q9Z2Y8	sp|Q9Z2Y8|PROSC_MOUSE	Proline synthase co-transcribed bacterial homolog protein Prosc	0.933333	-0.0689929
Q8BGB7	sp|Q8BGB7|ENOPH_MOUSE	Enolase-phosphatase E1 Enoph1	0.932692	-0.0696799
Q8BJS4	sp|Q8BJS4|SUN2_MOUSE	SUN domain-containing protein 2 Sun2	0.932692	-0.0696799
Q8VHX6	sp|Q8VHX6|FLNC_MOUSE	Filamin-C Flnc	0.932039	-0.0703808
Q810B6	sp|Q810B6|ANFY1_MOUSE	Ankyrin repeat and FYVE domain-containing protein 1 Ankfy1	0.931818	-0.0706176
P97807	sp|P97807|FUMH_MOUSE	Fumarate hydratase, mitochondrial Fh	0.931373	-0.0710959
Q9JKK7	sp|Q9JKK7|TMOD2_MOUSE	Tropomodulin-2 Tmod2	0.931034	-0.071459
P26040	sp|P26040|EZRI_MOUSE	Ezrin Ezr	0.930435	-0.0721033
P25444	sp|P25444|RS2_MOUSE	40S ribosomal protein S2 Rps2	0.927928	-0.0748012
Q64332	sp|Q64332|SYN2_MOUSE	Synapsin-2 Syn2	0.927273	-0.0755076
Q78JT3	sp|Q78JT3|3HAO_MOUSE	3-hydroxyanthranilate 3,4-dioxygenase Haao	0.927273	-0.0755076
Q61029	sp|Q61029|LAP2B_MOUSE	Lamina-associated polypeptide 2, isoforms beta/delta/epsilon/gamma Tmpo	0.927083	-0.0757118
Q61033	sp|Q61033|LAP2A_MOUSE	Lamina-associated polypeptide 2, isoforms alpha/zeta Tmpo	0.927083	-0.0757118
Q9Z0P4	sp|Q9Z0P4|PALM_MOUSE	Paralemmin-1 Palm	0.927083	-0.0757118
Q9QZD8	sp|Q9QZD8|DIC_MOUSE	Mitochondrial dicarboxylate carrier Slc25a10	0.925926	-0.076961
P06151	sp|P06151|LDHA_MOUSE	L-lactate dehydrogenase A chain Ldha	0.925234	-0.077709
Q60829	sp|Q60829|PPR1B_MOUSE	Protein phosphatase 1 regulatory subunit 1B Ppp1r1b	0.925234	-0.077709
O55135	sp|O55135|IF6_MOUSE	Eukaryotic translation initiation factor 6 Eif6	0.925	-0.0779615
Q9DB20	sp|Q9DB20|ATPO_MOUSE	ATP synthase subunit O, mitochondrial Atp5o	0.924528	-0.0784716
O55103	sp|O55103|PRAX_MOUSE	Periaxin Prx	0.92381	-0.0792494
O88986	sp|O88986|KBL_MOUSE	2-amino-3-ketobutyrate coenzyme A ligase, mitochondrial Gcat	0.923729	-0.0793367
P14869	sp|P14869|RLA0_MOUSE	60S acidic ribosomal protein P0 Rplp0	0.923077	-0.0800427
O88935	sp|O88935|SYN1_MOUSE	Synapsin-1 Syn1	0.92233	-0.0808521
Q8BTI8	sp|Q8BTI8|SRRM2_MOUSE	Serine/arginine repetitive matrix protein 2 Srrm2	0.92	-0.0833816
Q8K298	sp|Q8K298|ANLN_MOUSE	Actin-binding protein anillin Anln	0.919753	-0.08365
Q7TSJ2	sp|Q7TSJ2|MAP6_MOUSE	Microtubule-associated protein 6 Map6	0.918919	-0.0845574
P54775	sp|P54775|PRS6B_MOUSE	26S protease regulatory subunit 6B Psmc4	0.918699	-0.0847965
P62301	sp|P62301|RS13_MOUSE	40S ribosomal protein S13 Rps13	0.917431	-0.0861777
P63276	sp|P63276|RS17_MOUSE	40S ribosomal protein S17 Rps17	0.915966	-0.0877756
P06909	sp|P06909|CFAH_MOUSE	Complement factor H Cfh	0.915888	-0.0878614
Q8R361	sp|Q8R361|RFIP5_MOUSE	Rab11 family-interacting protein 5 Rab11fip5	0.915888	-0.0878614
Q9R1P3	sp|Q9R1P3|PSB2_MOUSE	Proteasome subunit beta type-2 Psmb2	0.91453	-0.0893451
Q9JHU4	sp|Q9JHU4|DYHC1_MOUSE	Cytoplasmic dynein 1 heavy chain 1 Dync1h1	0.913462	-0.090514
Q91V76	sp|Q91V76|CK054_MOUSE	Ester hydrolase C11orf54 homolog	0.912281	-0.0918075
Q60972	sp|Q60972|RBBP4_MOUSE	Histone-binding protein RBBP4 Rbbp4	0.911765	-0.0923733
O88643	sp|O88643|PAK1_MOUSE	Serine/threonine-protein kinase PAK 1 Pak1	0.911504	-0.0926588
P47708	sp|P47708|RP3A_MOUSE	Rabphilin-3A Rph3a	0.910714	-0.0935261
P59999	sp|P59999|ARPC4_MOUSE	Actin-related protein 2/3 complex subunit 4 Arpc4	0.90625	-0.0984401
Q9QZ88	sp|Q9QZ88|VPS29_MOUSE	Vacuolar protein sorting-associated protein 29 Vps29	0.905797	-0.0989399
Q61792	sp|Q61792|LASP1_MOUSE	LIM and SH3 domain protein 1 Lasp1	0.90566	-0.0990909
P05063	sp|P05063|ALDOC_MOUSE	Fructose-bisphosphate aldolase C Aldoc	0.903846	-0.101096
Q9Z0N1	sp|Q9Z0N1|IF2G_MOUSE	Eukaryotic translation initiation factor 2 subunit 3, X-linked Eif2s3x	0.902655	-0.102415
Q8VDM4	sp|Q8VDM4|PSMD2_MOUSE	26S proteasome non-ATPase regulatory subunit 2 Psmd2	0.901961	-0.103184
Q00623	sp|Q00623|APOA1_MOUSE	Apolipoprotein A-I Apoa1	0.901786	-0.103378
P54310	sp|P54310|LIPS_MOUSE	Hormone-sensitive lipase Lipe	0.90099	-0.104261
Q9JLV1	sp|Q9JLV1|BAG3_MOUSE	BAG family molecular chaperone regulator 3 Bag3	0.9	-0.105361
P26041	sp|P26041|MOES_MOUSE	Moesin Msn	0.899083	-0.10638
P14211	sp|P14211|CALR_MOUSE	Calreticulin Calr	0.897196	-0.108481
P19253	sp|P19253|RL13A_MOUSE	60S ribosomal protein L13a Rpl13a	0.897196	-0.108481
Q91WJ8	sp|Q91WJ8|FUBP1_MOUSE	Far upstream element-binding protein 1 Fubp1	0.896825	-0.108894
Q6URW6	sp|Q6URW6|MYH14_MOUSE	Myosin-14 Myh14	0.896552	-0.109199
Q9Z204	sp|Q9Z204|HNRPC_MOUSE	Heterogeneous nuclear ribonucleoproteins C1/C2 Hnrnpc	0.896226	-0.109562
Q9DCS9	sp|Q9DCS9|NDUBA_MOUSE	NADH dehydrogenase [ubiquinone] 1 beta subcomplex subunit 10 Ndufb10	0.895522	-0.110348
Q61703	sp|Q61703|ITIH2_MOUSE	Inter-alpha-trypsin inhibitor heavy chain H2 Itih2	0.895238	-0.110666
Q01149	sp|Q01149|CO1A2_MOUSE	Collagen alpha-2(I) chain Col1a2	0.894231	-0.111791
P43024	sp|P43024|CX6A1_MOUSE	Cytochrome c oxidase subunit 6A1, mitochondrial Cox6a1	0.894231	-0.111791
Q60864	sp|Q60864|STIP1_MOUSE	Stress-induced-phosphoprotein 1 Stip1	0.894231	-0.111791
Q99JP6	sp|Q99JP6|HOME3_MOUSE	Homer protein homolog 3 Homer3	0.893939	-0.112117
Q99K41	sp|Q99K41|EMIL1_MOUSE	EMILIN-1 Emilin1	0.89	-0.116534
Q8CHC4	sp|Q8CHC4|SYNJ1_MOUSE	Synaptojanin-1 Synj1	0.888889	-0.117783
P59242	sp|P59242|CING_MOUSE	Cingulin Cgn	0.886179	-0.120836
Q9DCJ9	sp|Q9DCJ9|NPL_MOUSE	N-acetylneuraminate lyase Npl	0.885496	-0.121607
Q8K2K6	sp|Q8K2K6|AGFG1_MOUSE	Arf-GAP domain and FG repeat-containing protein 1 Agfg1	0.883929	-0.123379
P20357	sp|P20357|MAP2_MOUSE	Microtubule-associated protein 2 Map2	0.882883	-0.124563
P51125	sp|P51125|ICAL_MOUSE	Calpastatin Cast	0.882883	-0.124563
P63054	sp|P63054|PCP4_MOUSE	Purkinje cell protein 4 Pcp4	0.880952	-0.126752
P21981	sp|P21981|TGM2_MOUSE	Protein-glutamine gamma-glutamyltransferase 2 Tgm2	0.880734	-0.127
Q9DBL1	sp|Q9DBL1|ACDSB_MOUSE	Short/branched chain specific acyl-CoA dehydrogenase, mitochondrial Acadsb	0.87963	-0.128254
Q61233	sp|Q61233|PLSL_MOUSE	Plastin-2 Lcp1	0.87963	-0.128254
Q8CHR6	sp|Q8CHR6|DPYD_MOUSE	Dihydropyrimidine dehydrogenase [NADP(+)] Dpyd	0.877551	-0.13062
P20918	sp|P20918|PLMN_MOUSE	Plasminogen Plg	0.877358	-0.13084
Q9QZH3	sp|Q9QZH3|PPIE_MOUSE	Peptidyl-prolyl cis-trans isomerase E Ppie	0.877049	-0.131192
P08207	sp|P08207|S10AA_MOUSE	Protein S100-A10 S100a10	0.876289	-0.13206
P31001	sp|P31001|DESM_MOUSE	Desmin Des	0.875	-0.133531
P14602	sp|P14602|HSPB1_MOUSE	Heat shock protein beta-1 Hspb1	0.874016	-0.134657
Q8CC86	sp|Q8CC86|PNCB_MOUSE	Nicotinate phosphoribosyltransferase Naprt1	0.873563	-0.135175
P01897	sp|P01897|HA1L_MOUSE	H-2 class I histocompatibility antigen, L-D alpha chain H2-L	0.87156	-0.137471
P14206	sp|P14206|RSSA_MOUSE	40S ribosomal protein SA Rpsa	0.87069	-0.13847
P54823	sp|P54823|DDX6_MOUSE	Probable ATP-dependent RNA helicase DDX6 Ddx6	0.87037	-0.138836
P60487	sp|P60487|PLPP_MOUSE	Pyridoxal phosphate phosphatase Pdxp	0.87	-0.139262
O08784	sp|O08784|TCOF_MOUSE	Treacle protein Tcof1	0.868852	-0.140582
Q9D0F9	sp|Q9D0F9|PGM1_MOUSE	Phosphoglucomutase-1 Pgm1	0.868687	-0.140773
Q7M6Y3	sp|Q7M6Y3|PICA_MOUSE	Phosphatidylinositol-binding clathrin assembly protein Picalm	0.867925	-0.141651
P70670	sp|P70670|NACAM_MOUSE	Nascent polypeptide-associated complex subunit alpha, muscle-specific form Naca	0.867257	-0.14242
P31324	sp|P31324|KAP3_MOUSE	cAMP-dependent protein kinase type II-beta regulatory subunit Prkar2b	0.866667	-0.143101
P68037	sp|P68037|UB2L3_MOUSE	Ubiquitin-conjugating enzyme E2 L3 Ube2l3	0.866071	-0.143788
P70694	sp|P70694|DHB5_MOUSE	Estradiol 17 beta-dehydrogenase 5 Akr1c6	0.866071	-0.143788
Q9R0P3	sp|Q9R0P3|ESTD_MOUSE	S-formylglutathione hydrolase Esd	0.864198	-0.145954
Q9CZD3	sp|Q9CZD3|SYG_MOUSE	Glycine--tRNA ligase Gars	0.864	-0.146183
P45591	sp|P45591|COF2_MOUSE	Cofilin-2 Cfl2	0.864	-0.146183
Q8CGC7	sp|Q8CGC7|SYEP_MOUSE	Bifunctional glutamate/proline--tRNA ligase Eprs	0.861111	-0.149532
P62843	sp|P62843|RS15_MOUSE	40S ribosomal protein S15 Rps15	0.858407	-0.152677
O09167	sp|O09167|RL21_MOUSE	60S ribosomal protein L21 Rpl21	0.858333	-0.152763
Q8CHH9	sp|Q8CHH9|SEPT8_MOUSE	Septin-8 Sept8	0.857143	-0.154151
Q9JM76	sp|Q9JM76|ARPC3_MOUSE	Actin-related protein 2/3 complex subunit 3 Arpc3	0.857143	-0.154151
Q3TEA8	sp|Q3TEA8|HP1B3_MOUSE	Heterochromatin protein 1-binding protein 3 Hp1bp3	0.855932	-0.155564
Q8R016	sp|Q8R016|BLMH_MOUSE	Bleomycin hydrolase Blmh	0.854839	-0.156842
P46935	sp|P46935|NEDD4_MOUSE	E3 ubiquitin-protein ligase NEDD4 Nedd4	0.854369	-0.157392
P97379	sp|P97379|G3BP2_MOUSE	Ras GTPase-activating protein-binding protein 2 G3bp2	0.850877	-0.161487
Q62000	sp|Q62000|MIME_MOUSE	Mimecan Ogn	0.849057	-0.163629
Q9DBA8	sp|Q9DBA8|HUTI_MOUSE	Probable imidazolonepropionase Amdhd1	0.849057	-0.163629
Q64338	sp|Q64338|PDE1C_MOUSE	Calcium/calmodulin-dependent 3&#039;,5&#039;-cyclic nucleotide phosphodiesterase 1C Pde1c	0.849057	-0.163629
Q8BP67	sp|Q8BP67|RL24_MOUSE	60S ribosomal protein L24 Rpl24	0.845528	-0.167793
Q9QYJ0	sp|Q9QYJ0|DNJA2_MOUSE	DnaJ homolog subfamily A member 2 Dnaja2	0.845455	-0.167881
Q9WTQ5	sp|Q9WTQ5|AKA12_MOUSE	A-kinase anchor protein 12 Akap12	0.84	-0.174353
O09106	sp|O09106|HDAC1_MOUSE	Histone deacetylase 1 Hdac1	0.839623	-0.174803
Q9QYC0	sp|Q9QYC0|ADDA_MOUSE	Alpha-adducin Add1	0.833333	-0.182322
Q91VR2	sp|Q91VR2|ATPG_MOUSE	ATP synthase subunit gamma, mitochondrial Atp5c1	0.830189	-0.186102
Q80UV9	sp|Q80UV9|TAF1_MOUSE	Transcription initiation factor TFIID subunit 1 Taf1	0.828829	-0.187742
Q9R1T4	sp|Q9R1T4|SEPT6_MOUSE	Septin-6 Sept6	0.827586	-0.189242
Q7TQD2	sp|Q7TQD2|TPPP_MOUSE	Tubulin polymerization-promoting protein Tppp	0.826087	-0.191055
Q8BMK4	sp|Q8BMK4|CKAP4_MOUSE	Cytoskeleton-associated protein 4 Ckap4	0.825	-0.192372
Q06185	sp|Q06185|ATP5I_MOUSE	ATP synthase subunit e, mitochondrial Atp5i	0.821782	-0.19628
Q3UNH4	sp|Q3UNH4|GRIN1_MOUSE	G protein-regulated inducer of neurite outgrowth 1 Gprin1	0.821705	-0.196373
Q91ZX7	sp|Q91ZX7|LRP1_MOUSE	Prolow-density lipoprotein receptor-related protein 1 Lrp1	0.821138	-0.197064
P14152	sp|P14152|MDHC_MOUSE	Malate dehydrogenase, cytoplasmic Mdh1	0.817308	-0.20174
Q99JB2	sp|Q99JB2|STML2_MOUSE	Stomatin-like protein 2 Stoml2	0.816794	-0.202368
Q91W90	sp|Q91W90|TXND5_MOUSE	Thioredoxin domain-containing protein 5 Txndc5	0.815385	-0.204095
Q99LP6	sp|Q99LP6|GRPE1_MOUSE	GrpE protein homolog 1, mitochondrial Grpel1	0.811321	-0.209092
Q9QYG0	sp|Q9QYG0|NDRG2_MOUSE	Protein NDRG2 Ndrg2	0.808696	-0.212333
P70404	sp|P70404|IDHG1_MOUSE	Isocitrate dehydrogenase [NAD] subunit gamma 1, mitochondrial Idh3g	0.807339	-0.214011
Q9QYB1	sp|Q9QYB1|CLIC4_MOUSE	Chloride intracellular channel protein 4 Clic4	0.807143	-0.214255
Q62448	sp|Q62448|IF4G2_MOUSE	Eukaryotic translation initiation factor 4 gamma 2 Eif4g2	0.801887	-0.220788
Q91V14	sp|Q91V14|S12A5_MOUSE	Solute carrier family 12 member 5 Slc12a5	0.8	-0.223144
Q9D727	sp|Q9D727|CF226_MOUSE	Uncharacterized protein C6orf226 homolog	0.79661	-0.22739
P12658	sp|P12658|CALB1_MOUSE	Calbindin Calb1	0.794393	-0.230178
Q02819	sp|Q02819|NUCB1_MOUSE	Nucleobindin-1 Nucb1	0.791667	-0.233615
O08810	sp|O08810|U5S1_MOUSE	116 kDa U5 small nuclear ribonucleoprotein component Eftud2	0.789474	-0.236389
Q8BVI4	sp|Q8BVI4|DHPR_MOUSE	Dihydropteridine reductase Qdpr	0.788321	-0.23785
Q7TQG0	sp|Q7TQG0|ZBTB5_MOUSE	Zinc finger and BTB domain-containing protein 5 Zbtb5	0.788321	-0.23785
Q3U0V1	sp|Q3U0V1|FUBP2_MOUSE	Far upstream element-binding protein 2 Khsrp	0.787037	-0.23948
O88533	sp|O88533|DDC_MOUSE	Aromatic-L-amino-acid decarboxylase Ddc	0.784946	-0.24214
Q9CYZ2	sp|Q9CYZ2|TPD54_MOUSE	Tumor protein D54 Tpd52l2	0.782609	-0.245122
Q9EQK5	sp|Q9EQK5|MVP_MOUSE	Major vault protein Mvp	0.776699	-0.252702
P80313	sp|P80313|TCPH_MOUSE	T-complex protein 1 subunit eta Cct7	0.776699	-0.252702
Q9DBX3	sp|Q9DBX3|SUSD2_MOUSE	Sushi domain-containing protein 2 Susd2	0.774194	-0.255933
Q9DC33	sp|Q9DC33|HM20A_MOUSE	High mobility group protein 20A Hmg20a	0.773109	-0.257335
Q8BL65	sp|Q8BL65|ABLM2_MOUSE	Actin-binding LIM protein 2 Ablim2	0.772277	-0.258412
Q8BHD7	sp|Q8BHD7|PTBP3_MOUSE	Polypyrimidine tract-binding protein 3 Ptbp3	0.768421	-0.263417
Q9CWJ9	sp|Q9CWJ9|PUR9_MOUSE	Bifunctional purine biosynthesis protein PURH Atic	0.75969	-0.274845
Q9D7S7	sp|Q9D7S7|RL22L_MOUSE	60S ribosomal protein L22-like 1 Rpl22l1	0.754717	-0.281412
Q9D668	sp|Q9D668|ARRD2_MOUSE	Arrestin domain-containing protein 2 Arrdc2	0.747475	-0.291055
Q78PY7	sp|Q78PY7|SND1_MOUSE	Staphylococcal nuclease domain-containing protein 1 Snd1	0.747368	-0.291197
P12960	sp|P12960|CNTN1_MOUSE	Contactin-1 Cntn1	0.747368	-0.291197
P03953	sp|P03953|CFAD_MOUSE	Complement factor D Cfd	0.745614	-0.293547
P17427	sp|P17427|AP2A2_MOUSE	AP-2 complex subunit alpha-2 Ap2a2	0.737226	-0.30486
P61458	sp|P61458|PHS_MOUSE	Pterin-4-alpha-carbinolamine dehydratase Pcbd1	0.734694	-0.308301
Q9CQ69	sp|Q9CQ69|QCR8_MOUSE	Cytochrome b-c1 complex subunit 8 Uqcrq	0.725275	-0.321205
Q9QUR6	sp|Q9QUR6|PPCE_MOUSE	Prolyl endopeptidase Prep	0.725191	-0.32132
P50580	sp|P50580|PA2G4_MOUSE	Proliferation-associated protein 2G4 Pa2g4	0.724771	-0.3219
Q91VA0	sp|Q91VA0|ACSM1_MOUSE	Acyl-coenzyme A synthetase ACSM1, mitochondrial Acsm1	0.72	-0.328504
P23492	sp|P23492|PNPH_MOUSE	Purine nucleoside phosphorylase Pnp	0.717172	-0.33244
Q9JHJ0	sp|Q9JHJ0|TMOD3_MOUSE	Tropomodulin-3 Tmod3	0.711268	-0.340707
Q6ZWQ0	sp|Q6ZWQ0|SYNE2_MOUSE	Nesprin-2 Syne2	0.701987	-0.353841
P80314	sp|P80314|TCPB_MOUSE	T-complex protein 1 subunit beta Cct2	0.697987	-0.359555
Q9CQ60	sp|Q9CQ60|6PGL_MOUSE	6-phosphogluconolactonase Pgls	0.695652	-0.362905
P42125	sp|P42125|ECI1_MOUSE	Enoyl-CoA delta isomerase 1, mitochondrial Eci1	0.695238	-0.363501
P70168	sp|P70168|IMB1_MOUSE	Importin subunit beta-1 Kpnb1	0.693431	-0.366104
P55302	sp|P55302|AMRP_MOUSE	Alpha-2-macroglobulin receptor-associated protein Lrpap1	0.691667	-0.368651
P60840	sp|P60840|ENSA_MOUSE	Alpha-endosulfine Ensa	0.691489	-0.368908
P47754	sp|P47754|CAZA2_MOUSE	F-actin-capping protein subunit alpha-2 Capza2	0.691057	-0.369533
Q60749	sp|Q60749|KHDR1_MOUSE	KH domain-containing, RNA-binding, signal transduction-associated protein 1 Khdrbs1	0.688525	-0.373204
Q9QWI6	sp|Q9QWI6|SRCN1_MOUSE	SRC kinase signaling inhibitor 1 Srcin1	0.677852	-0.388826
Q6ZPV2	sp|Q6ZPV2|INO80_MOUSE	DNA helicase INO80 Ino80	0.675174	-0.392785
Q99LB7	sp|Q99LB7|SARDH_MOUSE	Sarcosine dehydrogenase, mitochondrial Sardh	0.67284	-0.396248
Q60973	sp|Q60973|RBBP7_MOUSE	Histone-binding protein RBBP7 Rbbp7	0.672727	-0.396415
P58871	sp|P58871|TB182_MOUSE	182 kDa tankyrase-1-binding protein Tnks1bp1	0.669725	-0.400888
Q9WV92	sp|Q9WV92|E41L3_MOUSE	Band 4.1-like protein 3 Epb41l3	0.666667	-0.405465
Q6ZQ58	sp|Q6ZQ58|LARP1_MOUSE	La-related protein 1 Larp1	0.65896	-0.417093
Q99JX3	sp|Q99JX3|GORS2_MOUSE	Golgi reassembly-stacking protein 2 Gorasp2	0.652439	-0.427038
O35295	sp|O35295|PURB_MOUSE	Transcriptional activator protein Pur-beta Purb	0.631068	-0.460342
Q9EQQ9	sp|Q9EQQ9|NCOAT_MOUSE	Bifunctional protein NCOAT Mgea5	0.621359	-0.475846
Q99NB9	sp|Q99NB9|SF3B1_MOUSE	Splicing factor 3B subunit 1 Sf3b1	0.62069	-0.476924
Q9DBS1	sp|Q9DBS1|TMM43_MOUSE	Transmembrane protein 43 Tmem43	0.619835	-0.478302
O88447	sp|O88447|KLC1_MOUSE	Kinesin light chain 1 Klc1	0.615942	-0.484602
Q9QZA0	sp|Q9QZA0|CAH5B_MOUSE	Carbonic anhydrase 5B, mitochondrial Ca5b	0.615385	-0.485508
O70400	sp|O70400|PDLI1_MOUSE	PDZ and LIM domain protein 1 Pdlim1	0.613793	-0.488097
Q921M3	sp|Q921M3|SF3B3_MOUSE	Splicing factor 3B subunit 3 Sf3b3	0.605263	-0.502092
P60904	sp|P60904|DNJC5_MOUSE	DnaJ homolog subfamily C member 5 Dnajc5	0.578947	-0.546544
P50429	sp|P50429|ARSB_MOUSE	Arylsulfatase B Arsb	0.577889	-0.548373
Q6P9K8	sp|Q6P9K8|CSKI1_MOUSE	Caskin-1 Caskin1	0.572222	-0.558228
Q8R050	sp|Q8R050|ERF3A_MOUSE	Eukaryotic peptide chain release factor GTP-binding subunit ERF3A Gspt1	0.571429	-0.559616
Q91XD4	sp|Q91XD4|FTCD_MOUSE	Formimidoyltransferase-cyclodeaminase Ftcd	0.565657	-0.569768
P83917	sp|P83917|CBX1_MOUSE	Chromobox protein homolog 1 Cbx1	0.559633	-0.580474
P97821	sp|P97821|CATC_MOUSE	Dipeptidyl peptidase 1 Ctsc	0.546296	-0.604594
Q9CQF3	sp|Q9CQF3|CPSF5_MOUSE	Cleavage and polyadenylation specificity factor subunit 5 Nudt21	0.514493	-0.664574
P61205	sp|P61205|ARF3_MOUSE	ADP-ribosylation factor 3 Arf3	0.5	-0.693147
Q8CBW3	sp|Q8CBW3|ABI1_MOUSE	Abl interactor 1 Abi1	0.5	-0.693147
P47857	sp|P47857|K6PF_MOUSE	6-phosphofructokinase, muscle type Pfkm	0.5	-0.693147
Q61768	sp|Q61768|KINH_MOUSE	Kinesin-1 heavy chain Kif5b	0.5	-0.693147
Q9CR62	sp|Q9CR62|M2OM_MOUSE	Mitochondrial 2-oxoglutarate/malate carrier protein Slc25a11	0.5	-0.693147
O89079	sp|O89079|COPE_MOUSE	Coatomer subunit epsilon Cope	0.5	-0.693147
P50171	sp|P50171|DHB8_MOUSE	Estradiol 17-beta-dehydrogenase 8 Hsd17b8	0.5	-0.693147
Q4VAA2	sp|Q4VAA2|CDV3_MOUSE	Protein CDV3 Cdv3	0.5	-0.693147
Q505F5	sp|Q505F5|LRC47_MOUSE	Leucine-rich repeat-containing protein 47 Lrrc47	0.5	-0.693147
Q8R1X6	sp|Q8R1X6|SPG20_MOUSE	Spartin Spg20	0.5	-0.693147
Q91V64	sp|Q91V64|ISOC1_MOUSE	Isochorismatase domain-containing protein 1 Isoc1	0.5	-0.693147
Q91WK1	sp|Q91WK1|SPRY4_MOUSE	SPRY domain-containing protein 4 Spryd4	0.5	-0.693147
Q99KQ4	sp|Q99KQ4|NAMPT_MOUSE	Nicotinamide phosphoribosyltransferase Nampt	0.5	-0.693147
Q9ERG2	sp|Q9ERG2|STRN3_MOUSE	Striatin-3 Strn3	0.5	-0.693147
Q9JHW2	sp|Q9JHW2|NIT2_MOUSE	Omega-amidase NIT2 Nit2	0.5	-0.693147
Q9JK37	sp|Q9JK37|MYOZ1_MOUSE	Myozenin-1 Myoz1	0.5	-0.693147
Q9JLZ3	sp|Q9JLZ3|AUHM_MOUSE	Methylglutaconyl-CoA hydratase, mitochondrial Auh	0.5	-0.693147
P32067	sp|P32067|LA_MOUSE	Lupus La protein homolog Ssb	0.5	-0.693147
P32261	sp|P32261|ANT3_MOUSE	Antithrombin-III Serpinc1	0.5	-0.693147
P47968	sp|P47968|RPIA_MOUSE	Ribose-5-phosphate isomerase Rpia	0.5	-0.693147
P61327	sp|P61327|MGN_MOUSE	Protein mago nashi homolog Magoh	0.5	-0.693147
Q3UGR5	sp|Q3UGR5|HDHD2_MOUSE	Haloacid dehalogenase-like hydrolase domain-containing protein 2 Hdhd2	0.5	-0.693147
Q60668	sp|Q60668|HNRPD_MOUSE	Heterogeneous nuclear ribonucleoprotein D0 Hnrnpd	0.5	-0.693147
Q61133	sp|Q61133|GSTT2_MOUSE	Glutathione S-transferase theta-2 Gstt2	0.5	-0.693147
Q62093	sp|Q62093|SRSF2_MOUSE	Serine/arginine-rich splicing factor 2 Srsf2	0.5	-0.693147
Q6A0A9	sp|Q6A0A9|F120A_MOUSE	Constitutive coactivator of PPAR-gamma-like protein 1 FAM120A	0.5	-0.693147
Q6PB66	sp|Q6PB66|LPPRC_MOUSE	Leucine-rich PPR motif-containing protein, mitochondrial Lrpprc	0.5	-0.693147
Q8BYK6	sp|Q8BYK6|YTHD3_MOUSE	YTH domain family protein 3 Ythdf3	0.5	-0.693147
Q8R3Q6	sp|Q8R3Q6|CCD58_MOUSE	Coiled-coil domain-containing protein 58 Ccdc58	0.5	-0.693147
Q8VI36	sp|Q8VI36|PAXI_MOUSE	Paxillin Pxn	0.5	-0.693147
Q9CR21	sp|Q9CR21|ACPM_MOUSE	Acyl carrier protein, mitochondrial Ndufab1	0.5	-0.693147
Q9D6Y7	sp|Q9D6Y7|MSRA_MOUSE	Mitochondrial peptide methionine sulfoxide reductase Msra	0.5	-0.693147
Q9D8Y0	sp|Q9D8Y0|EFHD2_MOUSE	EF-hand domain-containing protein D2 Efhd2	0.5	-0.693147
Q9ERG0	sp|Q9ERG0|LIMA1_MOUSE	LIM domain and actin-binding protein 1 Lima1	0.5	-0.693147
Q9QXB9	sp|Q9QXB9|DRG2_MOUSE	Developmentally-regulated GTP-binding protein 2 Drg2	0.5	-0.693147
A2ABU4	sp|A2ABU4|MYOM3_MOUSE	Myomesin-3 Myom3	0.5	-0.693147
B2RXC5	sp|B2RXC5|ZN382_MOUSE	Zinc finger protein 382 Znf382	0.5	-0.693147
E9QMW4	sp|E9QMW4|CP096_MOUSE	Putative uncharacterized protein C16orf96 homolog	0.5	-0.693147
O08999	sp|O08999|LTBP2_MOUSE	Latent-transforming growth factor beta-binding protein 2 Ltbp2	0.5	-0.693147
O35215	sp|O35215|DOPD_MOUSE	D-dopachrome decarboxylase Ddt	0.5	-0.693147
O55201	sp|O55201|SPT5H_MOUSE	Transcription elongation factor SPT5 Supt5h	0.5	-0.693147
O70503	sp|O70503|DHB12_MOUSE	Estradiol 17-beta-dehydrogenase 12 Hsd17b12	0.5	-0.693147
O88685	sp|O88685|PRS6A_MOUSE	26S protease regulatory subunit 6A Psmc3	0.5	-0.693147
P03911	sp|P03911|NU4M_MOUSE	NADH-ubiquinone oxidoreductase chain 4 Mtnd4	0.5	-0.693147
P11714	sp|P11714|CP2D9_MOUSE	Cytochrome P450 2D9 Cyp2d9	0.5	-0.693147
P20060	sp|P20060|HEXB_MOUSE	Beta-hexosaminidase subunit beta Hexb	0.5	-0.693147
P28301	sp|P28301|LYOX_MOUSE	Protein-lysine 6-oxidase Lox	0.5	-0.693147
P29387	sp|P29387|GBB4_MOUSE	Guanine nucleotide-binding protein subunit beta-4 Gnb4	0.5	-0.693147
P29416	sp|P29416|HEXA_MOUSE	Beta-hexosaminidase subunit alpha Hexa	0.5	-0.693147
P29788	sp|P29788|VTNC_MOUSE	Vitronectin Vtn	0.5	-0.693147
P35123	sp|P35123|UBP4_MOUSE	Ubiquitin carboxyl-terminal hydrolase 4 Usp4	0.5	-0.693147
P35235	sp|P35235|PTN11_MOUSE	Tyrosine-protein phosphatase non-receptor type 11 Ptpn11	0.5	-0.693147
P42227	sp|P42227|STAT3_MOUSE	Signal transducer and activator of transcription 3 Stat3	0.5	-0.693147
P46638	sp|P46638|RB11B_MOUSE	Ras-related protein Rab-11B Rab11b	0.5	-0.693147
P50428	sp|P50428|ARSA_MOUSE	Arylsulfatase A Arsa	0.5	-0.693147
P50543	sp|P50543|S10AB_MOUSE	Protein S100-A11 S100a11	0.5	-0.693147
P51667	sp|P51667|MLRV_MOUSE	Myosin regulatory light chain 2, ventricular/cardiac muscle isoform Myl2	0.5	-0.693147
P52875	sp|P52875|TM165_MOUSE	Transmembrane protein 165 Tmem165	0.5	-0.693147
P55284	sp|P55284|CADH5_MOUSE	Cadherin-5 Cdh5	0.5	-0.693147
P56376	sp|P56376|ACYP1_MOUSE	Acylphosphatase-1 Acyp1	0.5	-0.693147
P56395	sp|P56395|CYB5_MOUSE	Cytochrome b5 Cyb5a	0.5	-0.693147
P56399	sp|P56399|UBP5_MOUSE	Ubiquitin carboxyl-terminal hydrolase 5 Usp5	0.5	-0.693147
P56581	sp|P56581|TDG_MOUSE	G/T mismatch-specific thymine DNA glycosylase Tdg	0.5	-0.693147
P62270	sp|P62270|RS18_MOUSE	40S ribosomal protein S18 Rps18	0.5	-0.693147
P62717	sp|P62717|RL18A_MOUSE	60S ribosomal protein L18a Rpl18a	0.5	-0.693147
P70302	sp|P70302|STIM1_MOUSE	Stromal interaction molecule 1 Stim1	0.5	-0.693147
P70303	sp|P70303|PYRG2_MOUSE	CTP synthase 2 Ctps2	0.5	-0.693147
P70335	sp|P70335|ROCK1_MOUSE	Rho-associated protein kinase 1 Rock1	0.5	-0.693147
P82347	sp|P82347|SGCD_MOUSE	Delta-sarcoglycan Sgcd	0.5	-0.693147
P97929	sp|P97929|BRCA2_MOUSE	Breast cancer type 2 susceptibility protein homolog Brca2	0.5	-0.693147
Q00262	sp|Q00262|STX2_MOUSE	Syntaxin-2 Stx2	0.5	-0.693147
Q06770	sp|Q06770|CBG_MOUSE	Corticosteroid-binding globulin Serpina6	0.5	-0.693147
Q08481	sp|Q08481|PECA1_MOUSE	Platelet endothelial cell adhesion molecule Pecam1	0.5	-0.693147
Q3TJD7	sp|Q3TJD7|PDLI7_MOUSE	PDZ and LIM domain protein 7 Pdlim7	0.5	-0.693147
Q3U487	sp|Q3U487|HECD3_MOUSE	E3 ubiquitin-protein ligase HECTD3 Hectd3	0.5	-0.693147
Q3UIA2	sp|Q3UIA2|RHG17_MOUSE	Rho GTPase-activating protein 17 Arhgap17	0.5	-0.693147
Q3UNZ8	sp|Q3UNZ8|QORL2_MOUSE	Quinone oxidoreductase-like protein 2	0.5	-0.693147
Q3V3R4	sp|Q3V3R4|ITA1_MOUSE	Integrin alpha-1 Itga1	0.5	-0.693147
Q4G0F8	sp|Q4G0F8|UBN1_MOUSE	Ubinuclein-1 Ubn1	0.5	-0.693147
Q5SWT3	sp|Q5SWT3|S2535_MOUSE	Solute carrier family 25 member 35 Slc25a35	0.5	-0.693147
Q60928	sp|Q60928|GGT1_MOUSE	Gamma-glutamyltranspeptidase 1 Ggt1	0.5	-0.693147
Q61084	sp|Q61084|M3K3_MOUSE	Mitogen-activated protein kinase kinase kinase 3 Map3k3	0.5	-0.693147
Q61292	sp|Q61292|LAMB2_MOUSE	Laminin subunit beta-2 Lamb2	0.5	-0.693147
Q61462	sp|Q61462|CY24A_MOUSE	Cytochrome b-245 light chain Cyba	0.5	-0.693147
Q61581	sp|Q61581|IBP7_MOUSE	Insulin-like growth factor-binding protein 7 Igfbp7	0.5	-0.693147
Q61818	sp|Q61818|RAI1_MOUSE	Retinoic acid-induced protein 1 Rai1	0.5	-0.693147
Q62048	sp|Q62048|PEA15_MOUSE	Astrocytic phosphoprotein PEA-15 Pea15	0.5	-0.693147
Q62348	sp|Q62348|TSN_MOUSE	Translin Tsn	0.5	-0.693147
Q64133	sp|Q64133|AOFA_MOUSE	Amine oxidase [flavin-containing] A Maoa	0.5	-0.693147
Q64674	sp|Q64674|SPEE_MOUSE	Spermidine synthase Srm	0.5	-0.693147
Q6GU68	sp|Q6GU68|ISLR_MOUSE	Immunoglobulin superfamily containing leucine-rich repeat protein Islr	0.5	-0.693147
Q6P3A8	sp|Q6P3A8|ODBB_MOUSE	2-oxoisovalerate dehydrogenase subunit beta, mitochondrial Bckdhb	0.5	-0.693147
Q6PAV2	sp|Q6PAV2|HERC4_MOUSE	Probable E3 ubiquitin-protein ligase HERC4 Herc4	0.5	-0.693147
Q6PD03	sp|Q6PD03|2A5A_MOUSE	Serine/threonine-protein phosphatase 2A 56 kDa regulatory subunit alpha isoform Ppp2r5a	0.5	-0.693147
Q6PDC0	sp|Q6PDC0|RUN3B_MOUSE	RUN domain-containing protein 3B Rundc3b	0.5	-0.693147
Q6PDN3	sp|Q6PDN3|MYLK_MOUSE	Myosin light chain kinase, smooth muscle Mylk	0.5	-0.693147
Q6PGB8	sp|Q6PGB8|SMCA1_MOUSE	Probable global transcription activator SNF2L1 Smarca1	0.5	-0.693147
Q6ZWN5	sp|Q6ZWN5|RS9_MOUSE	40S ribosomal protein S9 Rps9	0.5	-0.693147
Q791V5	sp|Q791V5|MTCH2_MOUSE	Mitochondrial carrier homolog 2 Mtch2	0.5	-0.693147
Q7TMY8	sp|Q7TMY8|HUWE1_MOUSE	E3 ubiquitin-protein ligase HUWE1 Huwe1	0.5	-0.693147
Q7TPM1	sp|Q7TPM1|PRC2B_MOUSE	Protein PRRC2B Prrc2b	0.5	-0.693147
Q80TF6	sp|Q80TF6|STAR9_MOUSE	StAR-related lipid transfer protein 9 Stard9	0.5	-0.693147
Q8BGY7	sp|Q8BGY7|F210A_MOUSE	Protein FAM210A Fam210a	0.5	-0.693147
Q8BH04	sp|Q8BH04|PCKGM_MOUSE	Phosphoenolpyruvate carboxykinase [GTP], mitochondrial Pck2	0.5	-0.693147
Q8BP40	sp|Q8BP40|PPA6_MOUSE	Lysophosphatidic acid phosphatase type 6 Acp6	0.5	-0.693147
Q8BPB0	sp|Q8BPB0|MOB1B_MOUSE	MOB kinase activator 1B Mob1b	0.5	-0.693147
Q8BVG4	sp|Q8BVG4|DPP9_MOUSE	Dipeptidyl peptidase 9 Dpp9	0.5	-0.693147
Q8BY98	sp|Q8BY98|SWAHD_MOUSE	Ankyrin repeat domain-containing protein SOWAHD Sowahd	0.5	-0.693147
Q8C0S1	sp|Q8C0S1|DI3L1_MOUSE	DIS3-like exonuclease 1 Dis3l	0.5	-0.693147
Q8C129	sp|Q8C129|LCAP_MOUSE	Leucyl-cystinyl aminopeptidase Lnpep	0.5	-0.693147
Q8C8U0	sp|Q8C8U0|LIPB1_MOUSE	Liprin-beta-1 Ppfibp1	0.5	-0.693147
Q8CI51	sp|Q8CI51|PDLI5_MOUSE	PDZ and LIM domain protein 5 Pdlim5	0.5	-0.693147
Q8K2I4	sp|Q8K2I4|MANBA_MOUSE	Beta-mannosidase Manba	0.5	-0.693147
Q8K3K7	sp|Q8K3K7|PLCB_MOUSE	1-acyl-sn-glycerol-3-phosphate acyltransferase beta Agpat2	0.5	-0.693147
Q8R1I1	sp|Q8R1I1|QCR9_MOUSE	Cytochrome b-c1 complex subunit 9 Uqcr10	0.5	-0.693147
Q8VHI3	sp|Q8VHI3|OFUT2_MOUSE	GDP-fucose protein O-fucosyltransferase 2 Pofut2	0.5	-0.693147
Q91VJ2	sp|Q91VJ2|PRDBP_MOUSE	Protein kinase C delta-binding protein Prkcdbp	0.5	-0.693147
Q91W18	sp|Q91W18|TDRD3_MOUSE	Tudor domain-containing protein 3 Tdrd3	0.5	-0.693147
Q91XC8	sp|Q91XC8|DAP1_MOUSE	Death-associated protein 1 Dap	0.5	-0.693147
Q91YX5	sp|Q91YX5|LGAT1_MOUSE	Acyl-CoA:lysophosphatidylglycerol acyltransferase 1 Lpgat1	0.5	-0.693147
Q91ZW2	sp|Q91ZW2|OFUT1_MOUSE	GDP-fucose protein O-fucosyltransferase 1 Pofut1	0.5	-0.693147
Q921X9	sp|Q921X9|PDIA5_MOUSE	Protein disulfide-isomerase A5 Pdia5	0.5	-0.693147
Q99JP4	sp|Q99JP4|CDC26_MOUSE	Anaphase-promoting complex subunit CDC26 Cdc26	0.5	-0.693147
Q99JY3	sp|Q99JY3|GIMA4_MOUSE	GTPase IMAP family member 4 Gimap4	0.5	-0.693147
Q99LY9	sp|Q99LY9|NDUS5_MOUSE	NADH dehydrogenase [ubiquinone] iron-sulfur protein 5 Ndufs5	0.5	-0.693147
Q9CPW0	sp|Q9CPW0|CNTP2_MOUSE	Contactin-associated protein-like 2 Cntnap2	0.5	-0.693147
Q9CQ22	sp|Q9CQ22|LTOR1_MOUSE	Ragulator complex protein LAMTOR1 Lamtor1	0.5	-0.693147
Q9CQ54	sp|Q9CQ54|NDUC2_MOUSE	NADH dehydrogenase [ubiquinone] 1 subunit C2 Ndufc2	0.5	-0.693147
Q9CXP8	sp|Q9CXP8|GBG10_MOUSE	Guanine nucleotide-binding protein G(I)/G(S)/G(O) subunit gamma-10 Gng10	0.5	-0.693147
Q9CY50	sp|Q9CY50|SSRA_MOUSE	Translocon-associated protein subunit alpha Ssr1	0.5	-0.693147
Q9CYH2	sp|Q9CYH2|F213A_MOUSE	Redox-regulatory protein FAM213A Fam213a	0.5	-0.693147
Q9CZJ2	sp|Q9CZJ2|HS12B_MOUSE	Heat shock 70 kDa protein 12B Hspa12b	0.5	-0.693147
Q9CZT5	sp|Q9CZT5|VASN_MOUSE	Vasorin Vasn	0.5	-0.693147
Q9D020	sp|Q9D020|5NT3_MOUSE	Cytosolic 5&#039;-nucleotidase 3 Nt5c3	0.5	-0.693147
Q9D1L9	sp|Q9D1L9|HBXIP_MOUSE	Hepatitis B virus X-interacting protein homolog Hbxip	0.5	-0.693147
Q9D281	sp|Q9D281|NXP20_MOUSE	Protein Noxp20 Fam114a1	0.5	-0.693147
Q9D735	sp|Q9D735|CS043_MOUSE	Uncharacterized protein C19orf43 homolog	0.5	-0.693147
Q9D7X3	sp|Q9D7X3|DUS3_MOUSE	Dual specificity protein phosphatase 3 Dusp3	0.5	-0.693147
Q9DBX1	sp|Q9DBX1|RGCC_MOUSE	Regulator of cell cycle RGCC Rgcc	0.5	-0.693147
Q9EPU0	sp|Q9EPU0|RENT1_MOUSE	Regulator of nonsense transcripts 1 Upf1	0.5	-0.693147
Q9EPX2	sp|Q9EPX2|PPN_MOUSE	Papilin Papln	0.5	-0.693147
Q9ESW4	sp|Q9ESW4|AGK_MOUSE	Acylglycerol kinase, mitochondrial Agk	0.5	-0.693147
Q9JIG7	sp|Q9JIG7|CCD22_MOUSE	Coiled-coil domain-containing protein 22 Ccdc22	0.5	-0.693147
Q9QUH0	sp|Q9QUH0|GLRX1_MOUSE	Glutaredoxin-1 Glrx	0.5	-0.693147
Q9WVB0	sp|Q9WVB0|RBPMS_MOUSE	RNA-binding protein with multiple splicing Rbpms	0.5	-0.693147
Q9Z139	sp|Q9Z139|ROR1_MOUSE	Tyrosine-protein kinase transmembrane receptor ROR1 Ror1	0.5	-0.693147
Q9CZ30	sp|Q9CZ30|OLA1_MOUSE	Obg-like ATPase 1 Ola1	0.5	-0.693147
Q7TMF3	sp|Q7TMF3|NDUAC_MOUSE	NADH dehydrogenase [ubiquinone] 1 alpha subcomplex subunit 12 Ndufa12	0.486239	-0.721056
P23591	sp|P23591|FCL_MOUSE	GDP-L-fucose synthase Tsta3	0.485437	-0.722706
Q62418	sp|Q62418|DBNL_MOUSE	Drebrin-like protein Dbnl	0.484058	-0.725551
Q9WTI7	sp|Q9WTI7|MYO1C_MOUSE	Unconventional myosin-Ic Myo1c	0.482906	-0.727933
P61922	sp|P61922|GABT_MOUSE	4-aminobutyrate aminotransferase, mitochondrial Abat	0.468599	-0.758008
Q569Z6	sp|Q569Z6|TR150_MOUSE	Thyroid hormone receptor-associated protein 3 Thrap3	0.463636	-0.768655
P49429	sp|P49429|HPPD_MOUSE	4-hydroxyphenylpyruvate dioxygenase Hpd	0.444444	-0.81093
Q8VDJ3	sp|Q8VDJ3|VIGLN_MOUSE	Vigilin Hdlbp	0.407051	-0.898816
Q3UHK3	sp|Q3UHK3|GREB1_MOUSE	Protein GREB1 Greb1	0.406897	-0.899196
Q91YQ5	sp|Q91YQ5|RPN1_MOUSE	Dolichyl-diphosphooligosaccharide--protein glycosyltransferase subunit 1 Rpn1	0.350515	-1.04835
Q99KJ8	sp|Q99KJ8|DCTN2_MOUSE	Dynactin subunit 2 Dctn2	0.333333	-1.09861
Q78ZA7	sp|Q78ZA7|NP1L4_MOUSE	Nucleosome assembly protein 1-like 4 Nap1l4	0.333333	-1.09861
P01831	sp|P01831|THY1_MOUSE	Thy-1 membrane glycoprotein Thy1	0.333333	-1.09861
P24547	sp|P24547|IMDH2_MOUSE	Inosine-5&#039;-monophosphate dehydrogenase 2 Impdh2	0.333333	-1.09861
P51660	sp|P51660|DHB4_MOUSE	Peroxisomal multifunctional enzyme type 2 Hsd17b4	0.333333	-1.09861
P67871	sp|P67871|CSK2B_MOUSE	Casein kinase II subunit beta Csnk2b	0.333333	-1.09861
Q60865	sp|Q60865|CAPR1_MOUSE	Caprin-1 Caprin1	0.333333	-1.09861
Q80YT7	sp|Q80YT7|MYOME_MOUSE	Myomegalin Pde4dip	0.333333	-1.09861
Q8BX17	sp|Q8BX17|GEMI5_MOUSE	Gem-associated protein 5 Gemin5	0.333333	-1.09861
Q91YR1	sp|Q91YR1|TWF1_MOUSE	Twinfilin-1 Twf1	0.333333	-1.09861
A6H6E2	sp|A6H6E2|MMRN2_MOUSE	Multimerin-2 Mmrn2	0.333333	-1.09861
O08663	sp|O08663|AMPM2_MOUSE	Methionine aminopeptidase 2 Metap2	0.333333	-1.09861
O08788	sp|O08788|DCTN1_MOUSE	Dynactin subunit 1 Dctn1	0.333333	-1.09861
O35074	sp|O35074|PTGIS_MOUSE	Prostacyclin synthase Ptgis	0.333333	-1.09861
O54734	sp|O54734|OST48_MOUSE	Dolichyl-diphosphooligosaccharide--protein glycosyltransferase 48 kDa subunit Ddost	0.333333	-1.09861
O70250	sp|O70250|PGAM2_MOUSE	Phosphoglycerate mutase 2 Pgam2	0.333333	-1.09861
O89020	sp|O89020|AFAM_MOUSE	Afamin Afm	0.333333	-1.09861
P02772	sp|P02772|FETA_MOUSE	Alpha-fetoprotein Afp	0.333333	-1.09861
P07759	sp|P07759|SPA3K_MOUSE	Serine protease inhibitor A3K Serpina3k	0.333333	-1.09861
P10605	sp|P10605|CATB_MOUSE	Cathepsin B Ctsb	0.333333	-1.09861
P10833	sp|P10833|RRAS_MOUSE	Ras-related protein R-Ras Rras	0.333333	-1.09861
P13516	sp|P13516|ACOD1_MOUSE	Acyl-CoA desaturase 1 Scd1	0.333333	-1.09861
P28658	sp|P28658|ATX10_MOUSE	Ataxin-10 Atxn10	0.333333	-1.09861
P60335	sp|P60335|PCBP1_MOUSE	Poly(rC)-binding protein 1 Pcbp1	0.333333	-1.09861
P62715	sp|P62715|PP2AB_MOUSE	Serine/threonine-protein phosphatase 2A catalytic subunit beta isoform Ppp2cb	0.333333	-1.09861
P62754	sp|P62754|RS6_MOUSE	40S ribosomal protein S6 Rps6	0.333333	-1.09861
P63030	sp|P63030|BR44L_MOUSE	Brain protein 44-like protein Brp44l	0.333333	-1.09861
P82198	sp|P82198|BGH3_MOUSE	Transforming growth factor-beta-induced protein ig-h3 Tgfbi	0.333333	-1.09861
P97333	sp|P97333|NRP1_MOUSE	Neuropilin-1 Nrp1	0.333333	-1.09861
Q3UPH1	sp|Q3UPH1|PRRC1_MOUSE	Protein PRRC1 Prrc1	0.333333	-1.09861
Q60634	sp|Q60634|FLOT2_MOUSE	Flotillin-2 Flot2	0.333333	-1.09861
Q61285	sp|Q61285|ABCD2_MOUSE	ATP-binding cassette sub-family D member 2 Abcd2	0.333333	-1.09861
Q61990	sp|Q61990|PCBP2_MOUSE	Poly(rC)-binding protein 2 Pcbp2	0.333333	-1.09861
Q7TNK1	sp|Q7TNK1|RFX4_MOUSE	Transcription factor RFX4 Rfx4	0.333333	-1.09861
Q8BU88	sp|Q8BU88|RM22_MOUSE	39S ribosomal protein L22, mitochondrial Mrpl22	0.333333	-1.09861
Q8C0I1	sp|Q8C0I1|ADAS_MOUSE	Alkyldihydroxyacetonephosphate synthase, peroxisomal Agps	0.333333	-1.09861
Q8K370	sp|Q8K370|ACD10_MOUSE	Acyl-CoA dehydrogenase family member 10 Acad10	0.333333	-1.09861
Q8VHE0	sp|Q8VHE0|SEC63_MOUSE	Translocation protein SEC63 homolog Sec63	0.333333	-1.09861
Q922Q8	sp|Q922Q8|LRC59_MOUSE	Leucine-rich repeat-containing protein 59 Lrrc59	0.333333	-1.09861
Q99MN9	sp|Q99MN9|PCCB_MOUSE	Propionyl-CoA carboxylase beta chain, mitochondrial Pccb	0.333333	-1.09861
Q99MR8	sp|Q99MR8|MCCA_MOUSE	Methylcrotonoyl-CoA carboxylase subunit alpha, mitochondrial Mccc1	0.333333	-1.09861
Q9DB60	sp|Q9DB60|PGFS_MOUSE	Prostamide/prostaglandin F synthase Fam213b	0.333333	-1.09861
Q9DC16	sp|Q9DC16|ERGI1_MOUSE	Endoplasmic reticulum-Golgi intermediate compartment protein 1 Ergic1	0.333333	-1.09861
Q9DCD6	sp|Q9DCD6|GBRAP_MOUSE	Gamma-aminobutyric acid receptor-associated protein Gabarap	0.333333	-1.09861
Q9ESD7	sp|Q9ESD7|DYSF_MOUSE	Dysferlin Dysf	0.333333	-1.09861
Q9QZ08	sp|Q9QZ08|NAGK_MOUSE	N-acetyl-D-glucosamine kinase Nagk	0.333333	-1.09861
Q9Z0R4	sp|Q9Z0R4|ITSN1_MOUSE	Intersectin-1 Itsn1	0.333333	-1.09861
Q9Z1E4	sp|Q9Z1E4|GYS1_MOUSE	Glycogen [starch] synthase, muscle Gys1	0.333333	-1.09861
Q9Z1T1	sp|Q9Z1T1|AP3B1_MOUSE	AP-3 complex subunit beta-1 Ap3b1	0.333333	-1.09861
Q6P3D0	sp|Q6P3D0|NUD16_MOUSE	U8 snoRNA-decapping enzyme Nudt16	0.323263	-1.12929
O35566	sp|O35566|CD151_MOUSE	CD151 antigen Cd151	0.267327	-1.31928
P97434	sp|P97434|MPRIP_MOUSE	Myosin phosphatase Rho-interacting protein Mprip	0.267016	-1.32045
P35979	sp|P35979|RL12_MOUSE	60S ribosomal protein L12 Rpl12	0.25	-1.38629
Q63918	sp|Q63918|SDPR_MOUSE	Serum deprivation-response protein Sdpr	0.25	-1.38629
Q64010	sp|Q64010|CRK_MOUSE	Adapter molecule crk Crk	0.25	-1.38629
P03987	sp|P03987|IGHG3_MOUSE	Ig gamma-3 chain C region	0.25	-1.38629
P27659	sp|P27659|RL3_MOUSE	60S ribosomal protein L3 Rpl3	0.25	-1.38629
Q60930	sp|Q60930|VDAC2_MOUSE	Voltage-dependent anion-selective channel protein 2 Vdac2	0.25	-1.38629
Q91VI7	sp|Q91VI7|RINI_MOUSE	Ribonuclease inhibitor Rnh1	0.25	-1.38629
Q9CR86	sp|Q9CR86|CHSP1_MOUSE	Calcium-regulated heat stable protein 1 Carhsp1	0.25	-1.38629
O55029	sp|O55029|COPB2_MOUSE	Coatomer subunit beta&#039; Copb2	0.25	-1.38629
O88653	sp|O88653|LTOR3_MOUSE	Ragulator complex protein LAMTOR3 Lamtor3	0.25	-1.38629
O88958	sp|O88958|GNPI1_MOUSE	Glucosamine-6-phosphate isomerase 1 Gnpda1	0.25	-1.38629
P01661	sp|P01661|KV3A9_MOUSE	Ig kappa chain V-III region MOPC 63	0.25	-1.38629
P17665	sp|P17665|COX7C_MOUSE	Cytochrome c oxidase subunit 7C, mitochondrial Cox7c	0.25	-1.38629
P30416	sp|P30416|FKBP4_MOUSE	Peptidyl-prolyl cis-trans isomerase FKBP4 Fkbp4	0.25	-1.38629
P42925	sp|P42925|PXMP2_MOUSE	Peroxisomal membrane protein 2 Pxmp2	0.25	-1.38629
P48771	sp|P48771|CX7A2_MOUSE	Cytochrome c oxidase subunit 7A2, mitochondrial Cox7a2	0.25	-1.38629
P56392	sp|P56392|CX7A1_MOUSE	Cytochrome c oxidase subunit 7A1, mitochondrial Cox7a1	0.25	-1.38629
P97290	sp|P97290|IC1_MOUSE	Plasma protease C1 inhibitor Serping1	0.25	-1.38629
P99026	sp|P99026|PSB4_MOUSE	Proteasome subunit beta type-4 Psmb4	0.25	-1.38629
Q00612	sp|Q00612|G6PD1_MOUSE	Glucose-6-phosphate 1-dehydrogenase X G6pdx	0.25	-1.38629
Q05020	sp|Q05020|APOC2_MOUSE	Apolipoprotein C-II Apoc2	0.25	-1.38629
Q3V1T4	sp|Q3V1T4|P3H1_MOUSE	Prolyl 3-hydroxylase 1 Lepre1	0.25	-1.38629
Q64310	sp|Q64310|SURF4_MOUSE	Surfeit locus protein 4 Surf4	0.25	-1.38629
Q80ZF2	sp|Q80ZF2|IFNE_MOUSE	Interferon epsilon Ifne	0.25	-1.38629
Q8CCK0	sp|Q8CCK0|H2AW_MOUSE	Core histone macro-H2A.2 H2afy2	0.25	-1.38629
Q8K023	sp|Q8K023|AKC1H_MOUSE	Aldo-keto reductase family 1 member C18 Akr1c18	0.25	-1.38629
Q8K411	sp|Q8K411|PREP_MOUSE	Presequence protease, mitochondrial Pitrm1	0.25	-1.38629
Q923B6	sp|Q923B6|STEA4_MOUSE	Metalloreductase STEAP4 Steap4	0.25	-1.38629
Q99LT0	sp|Q99LT0|DPY30_MOUSE	Protein dpy-30 homolog Dpy30	0.25	-1.38629
Q9CPW5	sp|Q9CPW5|SSRB_MOUSE	Translocon-associated protein subunit beta Ssr2	0.25	-1.38629
Q9CRB6	sp|Q9CRB6|TPPP3_MOUSE	Tubulin polymerization-promoting protein family member 3 Tppp3	0.25	-1.38629
Q9CVB6	sp|Q9CVB6|ARPC2_MOUSE	Actin-related protein 2/3 complex subunit 2 Arpc2	0.25	-1.38629
Q9CX80	sp|Q9CX80|CYGB_MOUSE	Cytoglobin Cygb	0.25	-1.38629
Q9QZE5	sp|Q9QZE5|COPG1_MOUSE	Coatomer subunit gamma-1 Copg1	0.25	-1.38629
Q9WTR5	sp|Q9WTR5|CAD13_MOUSE	Cadherin-13 Cdh13	0.25	-1.38629
Q9Z2I0	sp|Q9Z2I0|LETM1_MOUSE	LETM1 and EF-hand domain-containing protein 1, mitochondrial Letm1	0.25	-1.38629
Q3TLP5	sp|Q3TLP5|ECHD2_MOUSE	Enoyl-CoA hydratase domain-containing protein 2, mitochondrial Echdc2	0.2	-1.60944
Q99PT1	sp|Q99PT1|GDIR1_MOUSE	Rho GDP-dissociation inhibitor 1 Arhgdia	0.2	-1.60944
Q9D819	sp|Q9D819|IPYR_MOUSE	Inorganic pyrophosphatase Ppa1	0.2	-1.60944
Q9CQQ7	sp|Q9CQQ7|AT5F1_MOUSE	ATP synthase subunit b, mitochondrial Atp5f1	0.2	-1.60944
P06330	sp|P06330|HVM51_MOUSE	Ig heavy chain V region AC38 205.12	0.2	-1.60944
Q9ER00	sp|Q9ER00|STX12_MOUSE	Syntaxin-12 Stx12	0.2	-1.60944
P52825	sp|P52825|CPT2_MOUSE	Carnitine O-palmitoyltransferase 2, mitochondrial Cpt2	0.2	-1.60944
Q07646	sp|Q07646|MEST_MOUSE	Mesoderm-specific transcript protein Mest	0.2	-1.60944
Q64435	sp|Q64435|UD16_MOUSE	UDP-glucuronosyltransferase 1-6 Ugt1a6	0.2	-1.60944
Q8R0N6	sp|Q8R0N6|HOT_MOUSE	Hydroxyacid-oxoacid transhydrogenase, mitochondrial Adhfe1	0.2	-1.60944
Q91ZA3	sp|Q91ZA3|PCCA_MOUSE	Propionyl-CoA carboxylase alpha chain, mitochondrial Pcca	0.2	-1.60944
Q9QZ47	sp|Q9QZ47|TNNT3_MOUSE	Troponin T, fast skeletal muscle Tnnt3	0.2	-1.60944
Q8C8R3	sp|Q8C8R3|ANK2_MOUSE	Ankyrin-2 Ank2	0.186312	-1.68033
Q9QXG4	sp|Q9QXG4|ACSA_MOUSE	Acetyl-coenzyme A synthetase, cytoplasmic Acss2	0.166667	-1.79176
O55131	sp|O55131|SEPT7_MOUSE	Septin-7 Sept7	0.166667	-1.79176
Q61129	sp|Q61129|CFAI_MOUSE	Complement factor I Cfi	0.166667	-1.79176
Q61702	sp|Q61702|ITIH1_MOUSE	Inter-alpha-trypsin inhibitor heavy chain H1 Itih1	0.166667	-1.79176
Q2TPA8	sp|Q2TPA8|HSDL2_MOUSE	Hydroxysteroid dehydrogenase-like protein 2 Hsdl2	0.166667	-1.79176
Q8VDQ1	sp|Q8VDQ1|PTGR2_MOUSE	Prostaglandin reductase 2 Ptgr2	0.166667	-1.79176
Q99L13	sp|Q99L13|3HIDH_MOUSE	3-hydroxyisobutyrate dehydrogenase, mitochondrial Hibadh	0.166667	-1.79176
Q9WUM5	sp|Q9WUM5|SUCA_MOUSE	Succinyl-CoA ligase [ADP/GDP-forming] subunit alpha, mitochondrial Suclg1	0.166667	-1.79176
Q8BH61	sp|Q8BH61|F13A_MOUSE	Coagulation factor XIII A chain F13a1	0.166667	-1.79176
Q8CI43	sp|Q8CI43|MYL6B_MOUSE	Myosin light chain 6B Myl6b	0.166667	-1.79176
Q99JR5	sp|Q99JR5|TINAL_MOUSE	Tubulointerstitial nephritis antigen-like Tinagl1	0.146341	-1.92181
P61620	sp|P61620|S61A1_MOUSE	Protein transport protein Sec61 subunit alpha isoform 1 Sec61a1	0.142857	-1.94591
P97351	sp|P97351|RS3A_MOUSE	40S ribosomal protein S3a Rps3a	0.142857	-1.94591
Q3UPL0	sp|Q3UPL0|SC31A_MOUSE	Protein transport protein Sec31A Sec31a	0.142857	-1.94591
Q61576	sp|Q61576|FKB10_MOUSE	Peptidyl-prolyl cis-trans isomerase FKBP10 Fkbp10	0.142857	-1.94591
Q8BH97	sp|Q8BH97|RCN3_MOUSE	Reticulocalbin-3 Rcn3	0.142857	-1.94591
Q8BL97	sp|Q8BL97|SRSF7_MOUSE	Serine/arginine-rich splicing factor 7 Srsf7	0.125	-2.07944
P62908	sp|P62908|RS3_MOUSE	40S ribosomal protein S3 Rps3	0.125	-2.07944
Q5SWU9	sp|Q5SWU9|ACACA_MOUSE	Acetyl-CoA carboxylase 1 Acaca	0.125	-2.07944
P47934	sp|P47934|CACP_MOUSE	Carnitine O-acetyltransferase Crat	0.111111	-2.19722
P97461	sp|P97461|RS5_MOUSE	40S ribosomal protein S5 Rps5	0.111111	-2.19722
Q61147	sp|Q61147|CERU_MOUSE	Ceruloplasmin Cp	0.111111	-2.19722
Q61247	sp|Q61247|A2AP_MOUSE	Alpha-2-antiplasmin Serpinf2	0.111111	-2.19722
Q61398	sp|Q61398|PCOC1_MOUSE	Procollagen C-endopeptidase enhancer 1 Pcolce	0.111111	-2.19722
Q9D7N9	sp|Q9D7N9|APMAP_MOUSE	Adipocyte plasma membrane-associated protein Apmap	0.111111	-2.19722
Q9JK53	sp|Q9JK53|PRELP_MOUSE	Prolargin Prelp	0.111111	-2.19722
P37889	sp|P37889|FBLN2_MOUSE	Fibulin-2 Fbln2	0.1	-2.30259
Q91YE8	sp|Q91YE8|SYNP2_MOUSE	Synaptopodin-2 Synpo2	0.0989011	-2.31363
P07758	sp|P07758|A1AT1_MOUSE	Alpha-1-antitrypsin 1-1 Serpina1a	0.0909091	-2.3979
P23953	sp|P23953|EST1C_MOUSE	Carboxylesterase 1C Ces1c	0.0909091	-2.3979
P57776	sp|P57776|EF1D_MOUSE	Elongation factor 1-delta Eef1d	0.0909091	-2.3979
O08807	sp|O08807|PRDX4_MOUSE	Peroxiredoxin-4 Prdx4	0.0909091	-2.3979
O35678	sp|O35678|MGLL_MOUSE	Monoglyceride lipase Mgll	0.0909091	-2.3979
P07214	sp|P07214|SPRC_MOUSE	SPARC Sparc	0.0909091	-2.3979
P97457	sp|P97457|MLRS_MOUSE	Myosin regulatory light chain 2, skeletal muscle isoform Mylpf	0.0909091	-2.3979
E9Q9F6	sp|E9Q9F6|CTSRD_MOUSE	Cation channel sperm-associated protein subunit delta Catsperd	0.0877797	-2.43293
Q921H8	sp|Q921H8|THIKA_MOUSE	3-ketoacyl-CoA thiolase A, peroxisomal Acaa1a	0.0833333	-2.48491
P21550	sp|P21550|ENOB_MOUSE	Beta-enolase Eno3	0.0714286	-2.63906
P22599	sp|P22599|A1AT2_MOUSE	Alpha-1-antitrypsin 1-2 Serpina1b	0.0714286	-2.63906
P58774	sp|P58774|TPM2_MOUSE	Tropomyosin beta chain Tpm2	0.0714286	-2.63906
P58771	sp|P58771|TPM1_MOUSE	Tropomyosin alpha-1 chain Tpm1	0.0714286	-2.63906
P97927	sp|P97927|LAMA4_MOUSE	Laminin subunit alpha-4 Lama4	0.0625	-2.77259
Q00898	sp|Q00898|A1AT5_MOUSE	Alpha-1-antitrypsin 1-5 Serpina1e	0.0625	-2.77259
O88322	sp|O88322|NID2_MOUSE	Nidogen-2 Nid2	0.0588235	-2.83321
Q9QXS1	sp|Q9QXS1|PLEC_MOUSE	Plectin Plec	0.0526316	-2.94444
Q9Z2V4	sp|Q9Z2V4|PCKGC_MOUSE	Phosphoenolpyruvate carboxykinase, cytosolic [GTP] Pck1	0.0526316	-2.94444
Q02566	sp|Q02566|MYH6_MOUSE	Myosin-6 Myh6	0.05	-2.99573
Q922F4	sp|Q922F4|TBB6_MOUSE	Tubulin beta-6 chain Tubb6	0.047619	-3.04452
Q9Z0F7	sp|Q9Z0F7|SYUG_MOUSE	Gamma-synuclein Sncg	0.0454545	-3.09104
P43277	sp|P43277|H13_MOUSE	Histone H1.3 Hist1h1d	0.0434783	-3.13549
P13541	sp|P13541|MYH3_MOUSE	Myosin-3 Myh3	0.0434783	-3.13549
P05977	sp|P05977|MYL1_MOUSE	Myosin light chain 1/3, skeletal muscle isoform Myl1	0.0384615	-3.2581
P15532	sp|P15532|NDKA_MOUSE	Nucleoside diphosphate kinase A Nme1	0.0344828	-3.3673
P62806	sp|P62806|H4_MOUSE	Histone H4 Hist1h4a	0.027027	-3.61092
P68369	sp|P68369|TBA1A_MOUSE	Tubulin alpha-1A chain Tuba1a	0.02	-3.91202
Q5SX39	sp|Q5SX39|MYH4_MOUSE	Myosin-4 Myh4	0.015625	-4.15888
Q5SX40	sp|Q5SX40|MYH1_MOUSE	Myosin-1 Myh1	0.0136986	-4.29046
P13542	sp|P13542|MYH8_MOUSE	Myosin-8 Myh8	0.010101	-4.59512
